# Supplementary material for: AAT resistance-related AC007405.2 and AL354989.1 as novel diagnostic and prognostic markers in prostate cancer
Source: Aging (Albany NY). 2024 Apr 19;16(8):7249–66. doi: 10.18632/aging.205754 (PMC11087092; doi:10.18632/aging.205754)
Supplement: Supplementary Table 1 [file aging-16-205754-s002.xlsx]

## Sheet: Supplementary Table 1
Supplementary Table 1. The correlation between lncRNA and AAT resistance-related gene.
AAT resistance	lncRNA	cor	pvalue	Regulation
CD160	AC004594.1	0.888742	4.18e-168	postive
RORA-AS1	AC004594.1	0.932346	1.26e-218	postive
ARLNC1	AC004594.1	0.788516	1.63e-105	postive
MROH7	AC004594.1	0.795998	6.62e-109	postive
ADAMTSL4-AS2	AC004594.1	0.821922	7.42e-122	postive
SEMA6A-AS1	AC004594.1	0.863972	4.13e-148	postive
PRDX6-AS1	AC004594.1	0.738167	8.44e-86	postive
ZNF788P	AC004594.1	0.804452	6.49e-113	postive
CD160	AC084880.3	0.820963	2.44e-121	postive
RORA-AS1	AC084880.3	0.812731	4.92e-117	postive
ARLNC1	AC084880.3	0.768873	3.16e-97	postive
MROH7	AC084880.3	0.810091	1.07e-115	postive
ADAMTSL4-AS2	AC084880.3	0.774714	1.33e-99	postive
SEMA6A-AS1	AC084880.3	0.84394	1.24e-134	postive
PRDX6-AS1	AC084880.3	0.715632	2.17e-78	postive
ZNF788P	AC084880.3	0.75438	1.27e-91	postive
CD160	AC104662.1	0.736394	3.44e-85	postive
MROH7	AC104662.1	0.701281	4.89e-74	postive
SEMA6A-AS1	AC104662.1	0.811067	3.44e-116	postive
CD160	AC091435.2	0.754408	1.24e-91	postive
SEMA6A-AS1	AC091435.2	0.797648	1.13e-109	postive
HERC3	AP000553.9	0.701912	3.19e-74	postive
RMST	AP000553.9	0.783094	3.86e-103	postive
AQP4-AS1	AP000553.9	0.832218	1.34e-127	postive
SPEG	MIR1-1HG-AS1	0.90261	1.69e-181	postive
MYLK	MIR1-1HG-AS1	0.750778	2.73e-90	postive
CCDC69	MIR1-1HG-AS1	0.761865	1.82e-94	postive
SLC24A3	MIR1-1HG-AS1	0.716529	1.13e-78	postive
PIPOX	MIR1-1HG-AS1	0.764033	2.6e-95	postive
PLIN4	MIR1-1HG-AS1	0.761915	1.74e-94	postive
KCNIP3	MIR1-1HG-AS1	0.777586	8.48e-101	postive
LINC01778	MIR1-1HG-AS1	0.779382	1.49e-101	postive
BMERB1	MIR1-1HG-AS1	0.759274	1.8e-93	postive
UBXN10	MIR1-1HG-AS1	0.773151	5.83e-99	postive
ATP1A2	MIR1-1HG-AS1	0.77141	2.99e-98	postive
ACTG2	MIR1-1HG-AS1	0.785211	4.66e-104	postive
STAC	MIR1-1HG-AS1	0.746158	1.29e-88	postive
ACTA2	MIR1-1HG-AS1	0.816071	9.36e-119	postive
SYNE1	AC090825.1	0.713391	1.08e-77	postive
NHS	AC090825.1	0.719181	1.65e-79	postive
MROH7	AC090825.1	0.745413	2.39e-88	postive
KCNMA1	AC105383.1	0.744528	4.95e-88	postive
MMP16	AC105383.1	0.737279	1.71e-85	postive
ADRA1A	AC105383.1	0.766261	3.46e-96	postive
PREX2	AC105383.1	0.76505	1.04e-95	postive
SYNE1	AC105383.1	0.753428	2.87e-91	postive
ATRNL1	AC105383.1	0.741748	4.76e-87	postive
ITGA1	AC105383.1	0.750411	3.72e-90	postive
CD160	AC245884.10	0.84676	2.07e-136	postive
RORA-AS1	AC245884.10	0.936787	1.31e-225	postive
ARLNC1	AC245884.10	0.72191	2.21e-80	postive
MROH7	AC245884.10	0.760043	9.14e-94	postive
ADAMTSL4-AS2	AC245884.10	0.802929	3.54e-112	postive
SEMA6A-AS1	AC245884.10	0.786188	1.74e-104	postive
ZNF788P	AC245884.10	0.774569	1.52e-99	postive
CD160	TGFB3-AS1	0.839359	8.13e-132	postive
RORA-AS1	TGFB3-AS1	0.786178	1.76e-104	postive
ARLNC1	TGFB3-AS1	0.769851	1.28e-97	postive
MROH7	TGFB3-AS1	0.789142	8.6e-106	postive
ADAMTSL4-AS2	TGFB3-AS1	0.736299	3.71e-85	postive
SEMA6A-AS1	TGFB3-AS1	0.870135	1.07e-152	postive
PRDX6-AS1	TGFB3-AS1	0.733972	2.3e-84	postive
ZNF788P	TGFB3-AS1	0.748079	2.62e-89	postive
CD160	CYP2U1-AS1	0.795171	1.59e-108	postive
RORA-AS1	CYP2U1-AS1	0.770187	9.35e-98	postive
ARLNC1	CYP2U1-AS1	0.737405	1.55e-85	postive
MROH7	CYP2U1-AS1	0.729787	5.87e-83	postive
ADAMTSL4-AS2	CYP2U1-AS1	0.712976	1.45e-77	postive
SEMA6A-AS1	CYP2U1-AS1	0.816659	4.62e-119	postive
PRDX6-AS1	CYP2U1-AS1	0.700397	8.89e-74	postive
ZNF788P	CYP2U1-AS1	0.702334	2.39e-74	postive
SEMA6A-AS1	AC008467.1	0.799571	1.41e-110	postive
PRDX6-AS1	AC008467.1	0.700527	8.14e-74	postive
CD160	GHRLOS	0.841487	4.1e-133	postive
C6orf163	GHRLOS	0.740128	1.76e-86	postive
RORA-AS1	GHRLOS	0.910376	6.53e-190	postive
ARLNC1	GHRLOS	0.706711	1.18e-75	postive
MROH7	GHRLOS	0.765874	4.92e-96	postive
ADAMTSL4-AS2	GHRLOS	0.817763	1.22e-119	postive
SEMA6A-AS1	GHRLOS	0.823414	1.15e-122	postive
ZNF788P	GHRLOS	0.789329	7.1e-106	postive
CD160	AC110813.1	0.732314	8.37e-84	postive
HERC3	AC110813.1	0.77503	9.83e-100	postive
RORA-AS1	AC110813.1	0.760148	8.33e-94	postive
RMST	AC110813.1	0.813852	1.31e-117	postive
AQP4-AS1	AC110813.1	0.813547	1.88e-117	postive
CD160	AC018926.1	0.720777	5.11e-80	postive
RORA-AS1	AC018926.1	0.771178	3.71e-98	postive
SEMA6A-AS1	AC018926.1	0.717688	4.9e-79	postive
CD160	LANCL1-AS1	0.747311	4.97e-89	postive
RORA-AS1	LANCL1-AS1	0.71157	3.94e-77	postive
SEMA6A-AS1	LANCL1-AS1	0.722351	1.6e-80	postive
CD160	AC044781.1	0.844492	5.61e-135	postive
HERC3	AC044781.1	0.726413	7.65e-82	postive
RORA-AS1	AC044781.1	0.831194	5.2e-127	postive
ARLNC1	AC044781.1	0.760809	4.64e-94	postive
MROH7	AC044781.1	0.721367	3.31e-80	postive
ADAMTSL4-AS2	AC044781.1	0.703396	1.16e-74	postive
SEMA6A-AS1	AC044781.1	0.865362	4e-149	postive
PRDX6-AS1	AC044781.1	0.720914	4.62e-80	postive
ZNF788P	AC044781.1	0.734212	1.91e-84	postive
CUBN	ALG13-AS1	0.73763	1.29e-85	postive
CD160	ALG13-AS1	0.808814	4.64e-115	postive
RORA-AS1	ALG13-AS1	0.732123	9.71e-84	postive
ARLNC1	ALG13-AS1	0.736991	2.15e-85	postive
MROH7	ALG13-AS1	0.740817	1.01e-86	postive
ADAMTSL4-AS2	ALG13-AS1	0.737545	1.38e-85	postive
SEMA6A-AS1	ALG13-AS1	0.874668	3.21e-156	postive
PRDX6-AS1	ALG13-AS1	0.777393	1.02e-100	postive
ZNF788P	ALG13-AS1	0.774268	2.03e-99	postive
CFAP221	AL161618.1	0.843497	2.35e-134	postive
TTLL9	AL161618.1	0.755338	5.56e-92	postive
DNAH3	AL161618.1	0.83385	1.52e-128	postive
KCNMA1	AC107959.1	0.772477	1.1e-98	postive
EDNRA	AC107959.1	0.735345	7.86e-85	postive
ADRA1A	AC107959.1	0.769383	1.97e-97	postive
ARHGAP20	AC107959.1	0.766199	3.66e-96	postive
MYLK	AC107959.1	0.736264	3.81e-85	postive
SYNE1	AC107959.1	0.720132	8.22e-80	postive
NHS	AC107959.1	0.732576	6.84e-84	postive
CCDC69	AC107959.1	0.74814	2.5e-89	postive
SLC24A3	AC107959.1	0.759978	9.68e-94	postive
ITGA1	AC107959.1	0.744889	3.68e-88	postive
BMERB1	AC107959.1	0.725757	1.25e-81	postive
UBXN10	AC107959.1	0.70143	4.42e-74	postive
CACNA2D3	AC107959.1	0.707195	8.46e-76	postive
CD160	AC009065.3	0.754565	1.08e-91	postive
ARLNC1	AC009065.3	0.708312	3.89e-76	postive
SEMA6A-AS1	AC009065.3	0.823507	1.03e-122	postive
PRDX6-AS1	AC009065.3	0.705688	2.4e-75	postive
CD160	COL18A1-AS2	0.866025	1.3e-149	postive
RORA-AS1	COL18A1-AS2	0.905949	5.02e-185	postive
ARLNC1	COL18A1-AS2	0.782259	8.83e-103	postive
MROH7	COL18A1-AS2	0.826719	1.75e-124	postive
ADAMTSL4-AS2	COL18A1-AS2	0.815642	1.56e-118	postive
SEMA6A-AS1	COL18A1-AS2	0.855889	1.99e-142	postive
PRDX6-AS1	COL18A1-AS2	0.730915	2.47e-83	postive
ZNF788P	COL18A1-AS2	0.78665	1.09e-104	postive
CD160	AC034102.6	0.713075	1.35e-77	postive
SEMA6A-AS1	AC034102.6	0.815313	2.32e-118	postive
RORA-AS1	AC253572.1	0.72473	2.71e-81	postive
ITGA1	AP003548.1	0.704331	6.11e-75	postive
CMYA5	H19	0.906568	1.08e-185	postive
SYNPO2L	H19	0.921563	1.76e-203	postive
CA3	H19	0.916207	9.52e-197	postive
ALPK2	H19	0.747472	4.35e-89	postive
TBX15	H19	0.896581	1.92e-175	postive
NEB	H19	0.950924	8.93e-252	postive
FNDC5	H19	0.856205	1.22e-142	postive
EXTL1	H19	0.930708	3.6e-216	postive
ANKRD1	H19	0.909598	4.92e-189	postive
MYOZ1	H19	0.935797	5.21e-224	postive
PGLYRP2	AC007091.1	0.734011	2.24e-84	postive
DGKK	AC007091.1	0.936063	1.95e-224	postive
SLC6A19	AC007091.1	0.958055	4.25e-268	postive
ETV5	AC007091.1	0.804952	3.71e-113	postive
SPEG	AL049838.1	0.726276	8.48e-82	postive
REEP2	AL049838.1	0.721489	3.02e-80	postive
KCNIP3	AL049838.1	0.707051	9.35e-76	postive
BMERB1	AL049838.1	0.727418	3.58e-82	postive
ACTA2	AL049838.1	0.749419	8.56e-90	postive
CD160	PHC2-AS1	0.710424	8.84e-77	postive
RORA-AS1	PHC2-AS1	0.766597	2.55e-96	postive
SEMA6A-AS1	PHC2-AS1	0.748194	2.38e-89	postive
CUBN	KANSL1L-AS1	0.733027	4.82e-84	postive
CD160	KANSL1L-AS1	0.858554	2.92e-144	postive
LINC02614	KANSL1L-AS1	0.704304	6.22e-75	postive
C6orf163	KANSL1L-AS1	0.789935	3.8e-106	postive
RORA-AS1	KANSL1L-AS1	0.841616	3.42e-133	postive
ARLNC1	KANSL1L-AS1	0.711401	4.44e-77	postive
MROH7	KANSL1L-AS1	0.813634	1.7e-117	postive
ADAMTSL4-AS2	KANSL1L-AS1	0.793188	1.29e-107	postive
SEMA6A-AS1	KANSL1L-AS1	0.880623	4.59e-161	postive
PRDX6-AS1	KANSL1L-AS1	0.772246	1.37e-98	postive
ZNF788P	KANSL1L-AS1	0.805226	2.73e-113	postive
SEMA6A-AS1	AC098679.4	0.707536	6.67e-76	postive
RORA-AS1	AP001652.1	0.779786	1e-101	postive
CD160	AL392023.2	0.748439	1.94e-89	postive
RORA-AS1	AL392023.2	0.80463	5.32e-113	postive
MROH7	AL392023.2	0.702565	2.04e-74	postive
ADAMTSL4-AS2	AL392023.2	0.736291	3.73e-85	postive
SEMA6A-AS1	AL392023.2	0.767202	1.47e-96	postive
ZNF788P	AL392023.2	0.730169	4.38e-83	postive
KY	AC079467.1	0.732303	8.45e-84	postive
KCNMA1	MBNL1-AS1	0.797205	1.82e-109	postive
EDNRA	MBNL1-AS1	0.71186	3.21e-77	postive
ADRA1A	MBNL1-AS1	0.758885	2.54e-93	postive
GSDME	MBNL1-AS1	0.700358	9.13e-74	postive
MYLK	MBNL1-AS1	0.781352	2.16e-102	postive
CCDC69	MBNL1-AS1	0.715458	2.46e-78	postive
SLC24A3	MBNL1-AS1	0.715112	3.15e-78	postive
ITGA1	MBNL1-AS1	0.757981	5.6e-93	postive
BMERB1	MBNL1-AS1	0.735858	5.25e-85	postive
STAC	MBNL1-AS1	0.708411	3.63e-76	postive
ACTA2	MBNL1-AS1	0.802058	9.27e-112	postive
CD160	AL357936.1	0.738345	7.32e-86	postive
RORA-AS1	AL357936.1	0.719608	1.21e-79	postive
MROH7	AL357936.1	0.762886	7.3e-95	postive
ADAMTSL4-AS2	AL357936.1	0.702536	2.08e-74	postive
SEMA6A-AS1	AL357936.1	0.788544	1.59e-105	postive
CD160	Z95331.1	0.887144	1.12e-166	postive
LINC02614	Z95331.1	0.724279	3.8e-81	postive
HERC3	Z95331.1	0.726742	5.96e-82	postive
C6orf163	Z95331.1	0.726821	5.62e-82	postive
RORA-AS1	Z95331.1	0.921433	2.59e-203	postive
ARLNC1	Z95331.1	0.767525	1.09e-96	postive
MROH7	Z95331.1	0.799445	1.62e-110	postive
ADAMTSL4-AS2	Z95331.1	0.791329	8.99e-107	postive
SEMA6A-AS1	Z95331.1	0.870551	5.17e-153	postive
PRDX6-AS1	Z95331.1	0.751172	1.95e-90	postive
ZNF788P	Z95331.1	0.810983	3.79e-116	postive
SEMA6A-AS1	AC080188.1	0.76922	2.29e-97	postive
CD160	AC079313.1	0.838799	1.77e-131	postive
RORA-AS1	AC079313.1	0.862106	9.13e-147	postive
ARLNC1	AC079313.1	0.774611	1.46e-99	postive
MROH7	AC079313.1	0.839706	5.01e-132	postive
ADAMTSL4-AS2	AC079313.1	0.817582	1.52e-119	postive
SEMA6A-AS1	AC079313.1	0.843844	1.43e-134	postive
PRDX6-AS1	AC079313.1	0.71621	1.43e-78	postive
ZNF788P	AC079313.1	0.767793	8.53e-97	postive
CA3	AC099066.2	0.704106	7.13e-75	postive
ANKRD1	AC099066.2	0.729481	7.42e-83	postive
RORA-AS1	AC005599.1	0.780978	3.12e-102	postive
FER1L5	BX470102.2	0.749536	7.76e-90	postive
RNF165	BX470102.2	0.720107	8.37e-80	postive
SEMA6A-AS1	AC130456.3	0.703209	1.32e-74	postive
CD160	ADAMTS9-AS2	0.840708	1.23e-132	postive
RORA-AS1	ADAMTS9-AS2	0.74016	1.71e-86	postive
ARLNC1	ADAMTS9-AS2	0.700577	7.87e-74	postive
MROH7	ADAMTS9-AS2	0.845486	1.33e-135	postive
ADAMTSL4-AS2	ADAMTS9-AS2	0.724498	3.23e-81	postive
SEMA6A-AS1	ADAMTS9-AS2	0.844653	4.44e-135	postive
PRDX6-AS1	ADAMTS9-AS2	0.715717	2.04e-78	postive
ZNF788P	ADAMTS9-AS2	0.717167	7.15e-79	postive
APLF	ADAMTS9-AS2	0.7104	8.99e-77	postive
CD160	AC005070.3	0.901535	2.17e-180	postive
RORA-AS1	AC005070.3	0.852577	3.38e-140	postive
ARLNC1	AC005070.3	0.725804	1.21e-81	postive
MROH7	AC005070.3	0.802239	7.59e-112	postive
ADAMTSL4-AS2	AC005070.3	0.767851	8.09e-97	postive
SEMA6A-AS1	AC005070.3	0.860646	9.96e-146	postive
PRDX6-AS1	AC005070.3	0.749914	5.65e-90	postive
ZNF788P	AC005070.3	0.767194	1.48e-96	postive
APLF	AC005070.3	0.730553	3.26e-83	postive
PLA2G4D	AL445985.2	0.737963	9.92e-86	postive
SDCBP2	AL445985.2	0.954814	2.36e-260	postive
CUBN	JPX	0.700401	8.87e-74	postive
CD160	JPX	0.897167	5.15e-176	postive
LINC02614	JPX	0.721772	2.45e-80	postive
C6orf163	JPX	0.75154	1.43e-90	postive
RORA-AS1	JPX	0.905	5.2e-184	postive
ARLNC1	JPX	0.783494	2.59e-103	postive
MROH7	JPX	0.814586	5.5e-118	postive
ADAMTSL4-AS2	JPX	0.821586	1.13e-121	postive
SEMA6A-AS1	JPX	0.909425	7.69e-189	postive
PRDX6-AS1	JPX	0.789621	5.26e-106	postive
ZNF788P	JPX	0.838496	2.7e-131	postive
SH3RF3	SH3RF3-AS1	0.819626	1.26e-120	postive
CD160	AC083870.1	0.792895	1.76e-107	postive
RORA-AS1	AC083870.1	0.744953	3.49e-88	postive
ARLNC1	AC083870.1	0.750253	4.24e-90	postive
MROH7	AC083870.1	0.780086	7.48e-102	postive
ADAMTSL4-AS2	AC083870.1	0.718477	2.76e-79	postive
SEMA6A-AS1	AC083870.1	0.841989	2.02e-133	postive
PRDX6-AS1	AC083870.1	0.711188	5.16e-77	postive
ZNF788P	AC083870.1	0.728331	1.79e-82	postive
CD160	RPS6KA2-IT1	0.713928	7.36e-78	postive
CD160	AL731566.2	0.764644	1.5e-95	postive
SEMA6A-AS1	AL731566.2	0.803789	1.36e-112	postive
PRDX6-AS1	AL731566.2	0.707158	8.68e-76	postive
CUBN	AL096701.3	0.705143	3.5e-75	postive
CD160	AL096701.3	0.799114	2.32e-110	postive
LINC02614	AL096701.3	0.712698	1.77e-77	postive
C6orf163	AL096701.3	0.722863	1.09e-80	postive
RORA-AS1	AL096701.3	0.701996	3.01e-74	postive
MROH7	AL096701.3	0.731389	1.71e-83	postive
SEMA6A-AS1	AL096701.3	0.858956	1.53e-144	postive
PRDX6-AS1	AL096701.3	0.745507	2.21e-88	postive
ZNF788P	AL096701.3	0.754481	1.16e-91	postive
CD160	AC006947.1	0.774189	2.19e-99	postive
RORA-AS1	AC006947.1	0.722802	1.14e-80	postive
ARLNC1	AC006947.1	0.717581	5.29e-79	postive
MROH7	AC006947.1	0.758158	4.79e-93	postive
SEMA6A-AS1	AC006947.1	0.837319	1.37e-130	postive
PRDX6-AS1	AC006947.1	0.720626	5.71e-80	postive
ZNF788P	AC006947.1	0.714228	5.94e-78	postive
CD160	AL132642.1	0.814805	4.24e-118	postive
MROH7	AL132642.1	0.797913	8.5e-110	postive
ADAMTSL4-AS2	AL132642.1	0.704248	6.47e-75	postive
SEMA6A-AS1	AL132642.1	0.819182	2.17e-120	postive
CD160	ITGA6-AS1	0.811276	2.7e-116	postive
HERC3	ITGA6-AS1	0.774457	1.7e-99	postive
RORA-AS1	ITGA6-AS1	0.877407	2.04e-158	postive
RMST	ITGA6-AS1	0.771201	3.64e-98	postive
SEMA6A-AS1	ITGA6-AS1	0.712971	1.46e-77	postive
AQP4-AS1	ITGA6-AS1	0.735379	7.66e-85	postive
UCA1	AC093635.1	0.738801	5.09e-86	postive
CD160	AC010285.3	0.775533	6.09e-100	postive
RORA-AS1	AC010285.3	0.754829	8.62e-92	postive
ARLNC1	AC010285.3	0.717445	5.84e-79	postive
SEMA6A-AS1	AC010285.3	0.846622	2.53e-136	postive
PRDX6-AS1	AC010285.3	0.772884	7.5e-99	postive
ZNF788P	AC010285.3	0.751011	2.24e-90	postive
UCA1	MIR378D2HG	0.758191	4.66e-93	postive
CD160	AL121957.1	0.749746	6.5e-90	postive
RORA-AS1	AL121957.1	0.724709	2.76e-81	postive
MROH7	AL121957.1	0.730763	2.78e-83	postive
SEMA6A-AS1	AL121957.1	0.793115	1.39e-107	postive
PRDX6-AS1	AL121957.1	0.733604	3.07e-84	postive
C6orf163	SNRK-AS1	0.705579	2.59e-75	postive
RORA-AS1	SNRK-AS1	0.761984	1.63e-94	postive
ADAMTSL4-AS2	SNRK-AS1	0.721268	3.56e-80	postive
CD160	AC036103.1	0.847732	4.94e-137	postive
HERC3	AC036103.1	0.727333	3.81e-82	postive
RORA-AS1	AC036103.1	0.840069	3.02e-132	postive
ARLNC1	AC036103.1	0.726388	7.79e-82	postive
ADAMTSL4-AS2	AC036103.1	0.725186	1.93e-81	postive
SEMA6A-AS1	AC036103.1	0.853348	1.04e-140	postive
PRDX6-AS1	AC036103.1	0.752932	4.38e-91	postive
ZNF788P	AC036103.1	0.765464	7.14e-96	postive
SEMA6A-AS1	AC100823.1	0.721452	3.11e-80	postive
RORA-AS1	AL359921.1	0.756126	2.81e-92	postive
ADAMTSL4-AS2	AL359921.1	0.754468	1.18e-91	postive
CD160	GLYCTK-AS1	0.72176	2.47e-80	postive
RORA-AS1	GLYCTK-AS1	0.790743	1.65e-106	postive
MROH7	GLYCTK-AS1	0.70399	7.72e-75	postive
ADAMTSL4-AS2	GLYCTK-AS1	0.768193	5.91e-97	postive
SEMA6A-AS1	GLYCTK-AS1	0.788706	1.34e-105	postive
ZNF788P	GLYCTK-AS1	0.714766	4.04e-78	postive
SEMA6A-AS1	AC025034.1	0.713293	1.16e-77	postive
CD160	AP003419.2	0.784788	7.12e-104	postive
HERC3	AP003419.2	0.709377	1.85e-76	postive
RORA-AS1	AP003419.2	0.800871	3.42e-111	postive
SEMA6A-AS1	AP003419.2	0.791277	9.5e-107	postive
CD160	AC018410.1	0.823492	1.04e-122	postive
RORA-AS1	AC018410.1	0.719356	1.45e-79	postive
ARLNC1	AC018410.1	0.727383	3.67e-82	postive
MROH7	AC018410.1	0.745224	2.79e-88	postive
SEMA6A-AS1	AC018410.1	0.876341	1.48e-157	postive
PRDX6-AS1	AC018410.1	0.741159	7.67e-87	postive
ZNF788P	AC018410.1	0.725429	1.6e-81	postive
SLC39A2	AC021683.6	0.703055	1.46e-74	postive
CD160	FOXP1-AS1	0.865225	5.05e-149	postive
HERC3	FOXP1-AS1	0.719684	1.14e-79	postive
RORA-AS1	FOXP1-AS1	0.916067	1.41e-196	postive
ARLNC1	FOXP1-AS1	0.759272	1.8e-93	postive
MROH7	FOXP1-AS1	0.763797	3.22e-95	postive
ADAMTSL4-AS2	FOXP1-AS1	0.787869	3.16e-105	postive
SEMA6A-AS1	FOXP1-AS1	0.846105	5.39e-136	postive
PRDX6-AS1	FOXP1-AS1	0.742268	3.12e-87	postive
ZNF788P	FOXP1-AS1	0.789199	8.11e-106	postive
CD160	AC025271.2	0.884079	5.35e-164	postive
HERC3	AC025271.2	0.71137	4.54e-77	postive
RORA-AS1	AC025271.2	0.889888	3.83e-169	postive
ARLNC1	AC025271.2	0.775081	9.37e-100	postive
MROH7	AC025271.2	0.778865	2.46e-101	postive
ADAMTSL4-AS2	AC025271.2	0.771856	1.97e-98	postive
SEMA6A-AS1	AC025271.2	0.883469	1.79e-163	postive
PRDX6-AS1	AC025271.2	0.766452	2.91e-96	postive
ZNF788P	AC025271.2	0.786042	2.02e-104	postive
RORA-AS1	AL121790.2	0.725484	1.54e-81	postive
CD160	LINC01504	0.75446	1.18e-91	postive
RORA-AS1	LINC01504	0.836293	5.57e-130	postive
MROH7	LINC01504	0.79383	6.57e-108	postive
ADAMTSL4-AS2	LINC01504	0.813912	1.22e-117	postive
CD160	AC002074.1	0.754245	1.42e-91	postive
MROH7	AC002074.1	0.770231	8.98e-98	postive
SEMA6A-AS1	AC002074.1	0.761637	2.22e-94	postive
CD160	NR2F1-AS1	0.712629	1.86e-77	postive
PREX2	NR2F1-AS1	0.714807	3.92e-78	postive
CACNA1C	NR2F1-AS1	0.721287	3.51e-80	postive
SYNE1	NR2F1-AS1	0.763723	3.44e-95	postive
MROH7	NR2F1-AS1	0.706826	1.09e-75	postive
MANEA	FGD5-AS1	0.710796	6.8e-77	postive
TMTC2	FGD5-AS1	0.706596	1.28e-75	postive
GFM1	FGD5-AS1	0.749033	1.18e-89	postive
SYNE1	AL049775.1	0.735749	5.72e-85	postive
MIR221	AC234772.1	0.750393	3.77e-90	postive
CD160	AC098869.2	0.730827	2.64e-83	postive
SEMA6A-AS1	AC098869.2	0.800041	8.47e-111	postive
CD160	BCL2L1-AS1	0.877684	1.21e-158	postive
HERC3	BCL2L1-AS1	0.728207	1.96e-82	postive
RORA-AS1	BCL2L1-AS1	0.873783	1.6e-155	postive
ARLNC1	BCL2L1-AS1	0.76162	2.26e-94	postive
MROH7	BCL2L1-AS1	0.757939	5.81e-93	postive
ADAMTSL4-AS2	BCL2L1-AS1	0.740664	1.14e-86	postive
SEMA6A-AS1	BCL2L1-AS1	0.869627	2.62e-152	postive
PRDX6-AS1	BCL2L1-AS1	0.732792	5.78e-84	postive
ZNF788P	BCL2L1-AS1	0.762379	1.15e-94	postive
CD160	AC034102.8	0.773766	3.26e-99	postive
HERC3	AC034102.8	0.731798	1.25e-83	postive
RORA-AS1	AC034102.8	0.754163	1.53e-91	postive
SEMA6A-AS1	AC034102.8	0.7745	1.63e-99	postive
ZNF788P	AC034102.8	0.705541	2.66e-75	postive
CMYA5	C10orf71-AS1	0.918959	3.77e-200	postive
SYNPO2L	C10orf71-AS1	0.951223	2.07e-252	postive
CA3	C10orf71-AS1	0.970156	1.15e-303	postive
ALPK2	C10orf71-AS1	0.791708	6.06e-107	postive
TBX15	C10orf71-AS1	0.922241	2.28e-204	postive
NEB	C10orf71-AS1	0.950308	1.75e-250	postive
FNDC5	C10orf71-AS1	0.884978	8.93e-165	postive
EXTL1	C10orf71-AS1	0.962217	5.41e-279	postive
ANKRD1	C10orf71-AS1	0.917811	1.02e-198	postive
MYOZ1	C10orf71-AS1	0.981118	0	postive
CD160	AC010300.1	0.785851	2.45e-104	postive
C6orf163	AC010300.1	0.718847	2.1e-79	postive
RORA-AS1	AC010300.1	0.886719	2.66e-166	postive
MROH7	AC010300.1	0.778512	3.46e-101	postive
ADAMTSL4-AS2	AC010300.1	0.787002	7.63e-105	postive
SEMA6A-AS1	AC010300.1	0.727993	2.31e-82	postive
ZNF788P	AC010300.1	0.735548	6.7e-85	postive
MROH7	AC005495.1	0.707404	7.31e-76	postive
CD160	AP001885.3	0.777136	1.31e-100	postive
SEMA6A-AS1	AP001885.3	0.810734	5.06e-116	postive
CD160	NHS-AS1	0.860282	1.8e-145	postive
RORA-AS1	NHS-AS1	0.913593	1.27e-193	postive
ARLNC1	NHS-AS1	0.783101	3.83e-103	postive
MROH7	NHS-AS1	0.827044	1.15e-124	postive
ADAMTSL4-AS2	NHS-AS1	0.825374	9.72e-124	postive
SEMA6A-AS1	NHS-AS1	0.845144	2.18e-135	postive
PRDX6-AS1	NHS-AS1	0.719977	9.2e-80	postive
ZNF788P	NHS-AS1	0.78717	6.44e-105	postive
CD160	AC092301.1	0.754292	1.37e-91	postive
C6orf163	AC092301.1	0.729304	8.5e-83	postive
RORA-AS1	AC092301.1	0.805981	1.17e-113	postive
MROH7	AC092301.1	0.745441	2.33e-88	postive
ADAMTSL4-AS2	AC092301.1	0.819118	2.35e-120	postive
SEMA6A-AS1	AC092301.1	0.771427	2.94e-98	postive
ZNF788P	AC092301.1	0.737302	1.68e-85	postive
CNTN2	AC005696.4	0.74529	2.64e-88	postive
SYNGR4	AC005696.4	0.740425	1.38e-86	postive
VGF	AC005696.4	0.880029	1.43e-160	postive
CACNA1B	AC005696.4	0.729496	7.34e-83	postive
TTBK1	AC005696.4	0.840867	9.85e-133	postive
HRH3	AC005696.4	0.797406	1.47e-109	postive
CTNNA2	AC005696.4	0.791287	9.39e-107	postive
CD160	AC025188.1	0.828823	1.16e-125	postive
RORA-AS1	AC025188.1	0.829005	9.14e-126	postive
ARLNC1	AC025188.1	0.711305	4.75e-77	postive
MROH7	AC025188.1	0.708161	4.32e-76	postive
ADAMTSL4-AS2	AC025188.1	0.733027	4.81e-84	postive
SEMA6A-AS1	AC025188.1	0.852398	4.45e-140	postive
PRDX6-AS1	AC025188.1	0.736808	2.48e-85	postive
ZNF788P	AC025188.1	0.744234	6.29e-88	postive
SEMA6A-AS1	AC116552.1	0.747895	3.06e-89	postive
CD160	LRRC8C-DT	0.865506	3.14e-149	postive
RORA-AS1	LRRC8C-DT	0.808622	5.79e-115	postive
MROH7	LRRC8C-DT	0.778121	5.06e-101	postive
ADAMTSL4-AS2	LRRC8C-DT	0.717159	7.19e-79	postive
SEMA6A-AS1	LRRC8C-DT	0.784793	7.08e-104	postive
PRDX6-AS1	LRRC8C-DT	0.718429	2.86e-79	postive
ZNF788P	LRRC8C-DT	0.708822	2.72e-76	postive
APLF	LRRC8C-DT	0.752023	9.5e-91	postive
CD160	AC073130.2	0.881621	6.67e-162	postive
RORA-AS1	AC073130.2	0.938639	1.13e-228	postive
ARLNC1	AC073130.2	0.768457	4.63e-97	postive
MROH7	AC073130.2	0.848453	1.7e-137	postive
ADAMTSL4-AS2	AC073130.2	0.873773	1.63e-155	postive
SEMA6A-AS1	AC073130.2	0.836492	4.25e-130	postive
PRDX6-AS1	AC073130.2	0.715415	2.53e-78	postive
ZNF788P	AC073130.2	0.789041	9.54e-106	postive
CD160	MIATNB	0.718128	3.56e-79	postive
RORA-AS1	MIATNB	0.728513	1.56e-82	postive
SEMA6A-AS1	MIATNB	0.759936	1.01e-93	postive
PRDX6-AS1	MIATNB	0.720181	7.92e-80	postive
CD160	DIP2A-IT1	0.77602	3.82e-100	postive
HERC3	DIP2A-IT1	0.786433	1.36e-104	postive
RORA-AS1	DIP2A-IT1	0.833116	4.06e-128	postive
RMST	DIP2A-IT1	0.813713	1.55e-117	postive
AQP4-AS1	DIP2A-IT1	0.793874	6.28e-108	postive
CD160	AP000897.2	0.836102	7.23e-130	postive
RORA-AS1	AP000897.2	0.934707	2.81e-222	postive
ARLNC1	AP000897.2	0.734853	1.16e-84	postive
POTEE	AP000897.2	0.700598	7.76e-74	postive
MROH7	AP000897.2	0.774238	2.09e-99	postive
ADAMTSL4-AS2	AP000897.2	0.79205	4.25e-107	postive
SEMA6A-AS1	AP000897.2	0.786455	1.33e-104	postive
ZNF788P	AP000897.2	0.757159	1.15e-92	postive
CD160	AC092332.1	0.828378	2.06e-125	postive
HERC3	AC092332.1	0.730632	3.07e-83	postive
RORA-AS1	AC092332.1	0.812939	3.86e-117	postive
RMST	AC092332.1	0.734125	2.05e-84	postive
ARLNC1	AC092332.1	0.72341	7.27e-81	postive
MROH7	AC092332.1	0.70383	8.61e-75	postive
SEMA6A-AS1	AC092332.1	0.845001	2.69e-135	postive
PRDX6-AS1	AC092332.1	0.707073	9.21e-76	postive
ZNF788P	AC092332.1	0.715383	2.59e-78	postive
SHISAL1	ADAMTS9-AS1	0.756332	2.35e-92	postive
ARHGAP20	ADAMTS9-AS1	0.748068	2.65e-89	postive
MYLK	ADAMTS9-AS1	0.755272	5.89e-92	postive
PIPOX	ADAMTS9-AS1	0.798987	2.66e-110	postive
UBXN10	ADAMTS9-AS1	0.748125	2.53e-89	postive
CD160	AL513327.1	0.814972	3.48e-118	postive
LINC02614	AL513327.1	0.725712	1.3e-81	postive
C6orf163	AL513327.1	0.710029	1.17e-76	postive
RORA-AS1	AL513327.1	0.800969	3.07e-111	postive
MROH7	AL513327.1	0.751366	1.66e-90	postive
ADAMTSL4-AS2	AL513327.1	0.774715	1.33e-99	postive
SEMA6A-AS1	AL513327.1	0.829311	6.14e-126	postive
PRDX6-AS1	AL513327.1	0.735119	9.39e-85	postive
ZNF788P	AL513327.1	0.772733	8.65e-99	postive
CD160	AL020997.2	0.780031	7.89e-102	postive
RORA-AS1	AL020997.2	0.806624	5.63e-114	postive
ARLNC1	AL020997.2	0.740239	1.61e-86	postive
MROH7	AL020997.2	0.796849	2.67e-109	postive
ADAMTSL4-AS2	AL020997.2	0.760502	6.09e-94	postive
SEMA6A-AS1	AL020997.2	0.817343	2.03e-119	postive
ZNF788P	AL020997.2	0.719291	1.52e-79	postive
CUBN	AC090510.2	0.721265	3.57e-80	postive
CD160	AC090510.2	0.855863	2.08e-142	postive
C6orf163	AC090510.2	0.724408	3.45e-81	postive
RORA-AS1	AC090510.2	0.828175	2.68e-125	postive
ARLNC1	AC090510.2	0.719069	1.79e-79	postive
MROH7	AC090510.2	0.828933	1e-125	postive
ADAMTSL4-AS2	AC090510.2	0.787894	3.08e-105	postive
SEMA6A-AS1	AC090510.2	0.885734	1.96e-165	postive
PRDX6-AS1	AC090510.2	0.761898	1.76e-94	postive
ZNF788P	AC090510.2	0.78178	1.42e-102	postive
SEMA6A-AS1	AC037459.4	0.757395	9.34e-93	postive
PLAC9	LINC01996	0.74475	4.12e-88	postive
RORA-AS1	AC073648.7	0.856403	8.9e-143	postive
MROH7	AC073648.7	0.71998	9.18e-80	postive
ADAMTSL4-AS2	AC073648.7	0.789935	3.8e-106	postive
LINC01518	LINC01518	1	0	postive
RORA-AS1	IRAG1-AS1	0.795184	1.57e-108	postive
MROH7	IRAG1-AS1	0.714063	6.68e-78	postive
ADAMTSL4-AS2	IRAG1-AS1	0.702618	1.97e-74	postive
SEMA6A-AS1	IRAG1-AS1	0.706622	1.26e-75	postive
CCDC180	AC018809.2	0.70013	1.06e-73	postive
SEMA6A-AS1	AC011899.1	0.715757	1.98e-78	postive
CD160	EGFR-AS1	0.745058	3.2e-88	postive
SEMA6A-AS1	EGFR-AS1	0.831085	6.01e-127	postive
CD160	AC011466.1	0.750316	4.03e-90	postive
RORA-AS1	AC011466.1	0.71891	2.01e-79	postive
SEMA6A-AS1	AC011466.1	0.740299	1.53e-86	postive
CD160	KCNMA1-AS3	0.862129	8.79e-147	postive
RORA-AS1	KCNMA1-AS3	0.893937	6.65e-173	postive
ARLNC1	KCNMA1-AS3	0.785426	3.75e-104	postive
MROH7	KCNMA1-AS3	0.798737	3.49e-110	postive
ADAMTSL4-AS2	KCNMA1-AS3	0.788439	1.77e-105	postive
SEMA6A-AS1	KCNMA1-AS3	0.863111	1.73e-147	postive
PRDX6-AS1	KCNMA1-AS3	0.731163	2.04e-83	postive
ZNF788P	KCNMA1-AS3	0.778232	4.54e-101	postive
CD160	AC005899.7	0.719576	1.23e-79	postive
C6orf163	AC005899.7	0.753922	1.88e-91	postive
RORA-AS1	AC005899.7	0.724908	2.37e-81	postive
MROH7	AC005899.7	0.763231	5.36e-95	postive
SEMA6A-AS1	AC005899.7	0.763954	2.8e-95	postive
CD160	EGOT	0.802998	3.28e-112	postive
MROH7	EGOT	0.809307	2.63e-115	postive
ADAMTSL4-AS2	EGOT	0.722018	2.04e-80	postive
SEMA6A-AS1	EGOT	0.764964	1.12e-95	postive
SHISAL1	AC090515.4	0.713279	1.17e-77	postive
MYLK	AC090515.4	0.778578	3.25e-101	postive
CCDC69	AC090515.4	0.707337	7.66e-76	postive
SLC24A3	AC090515.4	0.728243	1.91e-82	postive
UBXN10	AC090515.4	0.710595	7.84e-77	postive
CD160	AL353697.1	0.741435	6.13e-87	postive
HERC3	AL353697.1	0.74651	9.67e-89	postive
RORA-AS1	AL353697.1	0.815995	1.02e-118	postive
RMST	AL353697.1	0.790449	2.24e-106	postive
SEMA6A-AS1	AL353697.1	0.725554	1.46e-81	postive
CD160	AC068282.1	0.877084	3.72e-158	postive
HERC3	AC068282.1	0.716104	1.54e-78	postive
RORA-AS1	AC068282.1	0.963845	1.36e-283	postive
ARLNC1	AC068282.1	0.756865	1.48e-92	postive
MROH7	AC068282.1	0.789063	9.32e-106	postive
ADAMTSL4-AS2	AC068282.1	0.813524	1.94e-117	postive
SEMA6A-AS1	AC068282.1	0.817786	1.19e-119	postive
ZNF788P	AC068282.1	0.774075	2.43e-99	postive
SMARCD3	SERTAD4-AS1	0.746083	1.38e-88	postive
KIFC3	SERTAD4-AS1	0.728255	1.89e-82	postive
CD160	AC025280.1	0.843658	1.86e-134	postive
RORA-AS1	AC025280.1	0.884973	9.02e-165	postive
ARLNC1	AC025280.1	0.775861	4.45e-100	postive
MROH7	AC025280.1	0.849294	4.85e-138	postive
ADAMTSL4-AS2	AC025280.1	0.830991	6.8e-127	postive
SEMA6A-AS1	AC025280.1	0.837624	8.99e-131	postive
PRDX6-AS1	AC025280.1	0.71481	3.91e-78	postive
ZNF788P	AC025280.1	0.772457	1.12e-98	postive
EMP3	LINC02106	0.703445	1.12e-74	postive
CD160	AL354726.1	0.873914	1.27e-155	postive
HERC3	AL354726.1	0.772754	8.48e-99	postive
RORA-AS1	AL354726.1	0.901407	2.93e-180	postive
RMST	AL354726.1	0.705066	3.69e-75	postive
ARLNC1	AL354726.1	0.733992	2.27e-84	postive
MROH7	AL354726.1	0.717974	3.98e-79	postive
ADAMTSL4-AS2	AL354726.1	0.741753	4.74e-87	postive
SEMA6A-AS1	AL354726.1	0.82869	1.38e-125	postive
PRDX6-AS1	AL354726.1	0.711448	4.29e-77	postive
ZNF788P	AL354726.1	0.753779	2.12e-91	postive
CD160	KCNIP1-OT1	0.780147	7.04e-102	postive
RORA-AS1	KCNIP1-OT1	0.733203	4.2e-84	postive
MROH7	KCNIP1-OT1	0.799735	1.18e-110	postive
SEMA6A-AS1	KCNIP1-OT1	0.752987	4.18e-91	postive
CD160	AC024382.1	0.830181	1.97e-126	postive
HERC3	AC024382.1	0.736948	2.22e-85	postive
RORA-AS1	AC024382.1	0.89038	1.36e-169	postive
ARLNC1	AC024382.1	0.72794	2.4e-82	postive
ADAMTSL4-AS2	AC024382.1	0.713351	1.11e-77	postive
SEMA6A-AS1	AC024382.1	0.802228	7.69e-112	postive
ZNF788P	AC024382.1	0.734156	2e-84	postive
LINC01762	LINC01762	1	0	postive
CD160	AC007336.1	0.843568	2.12e-134	postive
RORA-AS1	AC007336.1	0.725034	2.16e-81	postive
HLA-DQB1-AS1	AC007336.1	0.724906	2.38e-81	postive
MROH7	AC007336.1	0.81832	6.2e-120	postive
ADAMTSL4-AS2	AC007336.1	0.747368	4.75e-89	postive
SEMA6A-AS1	AC007336.1	0.816764	4.07e-119	postive
PRDX6-AS1	AC007336.1	0.702868	1.66e-74	postive
ZNF788P	AC007336.1	0.720538	6.1e-80	postive
APLF	AC007336.1	0.727097	4.56e-82	postive
CD160	AC105001.1	0.802652	4.81e-112	postive
PREX2	AC105001.1	0.704456	5.61e-75	postive
RORA-AS1	AC105001.1	0.709673	1.5e-76	postive
MROH7	AC105001.1	0.765305	8.25e-96	postive
ADAMTSL4-AS2	AC105001.1	0.730486	3.44e-83	postive
SEMA6A-AS1	AC105001.1	0.778844	2.51e-101	postive
APLF	AC105001.1	0.715584	2.24e-78	postive
CD160	AC008649.2	0.828414	1.97e-125	postive
RORA-AS1	AC008649.2	0.79511	1.7e-108	postive
ARLNC1	AC008649.2	0.766403	3.04e-96	postive
MROH7	AC008649.2	0.778861	2.47e-101	postive
ADAMTSL4-AS2	AC008649.2	0.729555	7.01e-83	postive
SEMA6A-AS1	AC008649.2	0.864688	1.24e-148	postive
PRDX6-AS1	AC008649.2	0.729592	6.82e-83	postive
ZNF788P	AC008649.2	0.744728	4.2e-88	postive
CD160	CARMN	0.784658	8.11e-104	postive
RORA-AS1	CARMN	0.710313	9.56e-77	postive
ARLNC1	CARMN	0.726893	5.32e-82	postive
MROH7	CARMN	0.79402	5.38e-108	postive
SEMA6A-AS1	CARMN	0.844718	4.05e-135	postive
PRDX6-AS1	CARMN	0.708866	2.64e-76	postive
ZNF788P	CARMN	0.710792	6.82e-77	postive
CD160	BACH1-IT1	0.82888	1.08e-125	postive
RORA-AS1	BACH1-IT1	0.874632	3.43e-156	postive
MROH7	BACH1-IT1	0.725549	1.47e-81	postive
ADAMTSL4-AS2	BACH1-IT1	0.782001	1.14e-102	postive
SEMA6A-AS1	BACH1-IT1	0.787297	5.66e-105	postive
ZNF788P	BACH1-IT1	0.734486	1.54e-84	postive
CD160	DANT2	0.869461	3.5e-152	postive
HERC3	DANT2	0.705013	3.82e-75	postive
RORA-AS1	DANT2	0.866603	4.86e-150	postive
ARLNC1	DANT2	0.762773	8.07e-95	postive
MROH7	DANT2	0.772805	8.08e-99	postive
ADAMTSL4-AS2	DANT2	0.745823	1.7e-88	postive
SEMA6A-AS1	DANT2	0.874375	5.47e-156	postive
PRDX6-AS1	DANT2	0.741412	6.25e-87	postive
ZNF788P	DANT2	0.769071	2.63e-97	postive
CD160	LINC02754	0.707502	6.83e-76	postive
RORA-AS1	LINC02754	0.733931	2.38e-84	postive
MROH7	LINC02754	0.773585	3.87e-99	postive
ADAMTSL4-AS2	LINC02754	0.701026	5.81e-74	postive
CD160	AC127035.1	0.830533	1.24e-126	postive
RORA-AS1	AC127035.1	0.832346	1.13e-127	postive
ARLNC1	AC127035.1	0.770175	9.46e-98	postive
MROH7	AC127035.1	0.792992	1.59e-107	postive
ADAMTSL4-AS2	AC127035.1	0.758234	4.49e-93	postive
SEMA6A-AS1	AC127035.1	0.859138	1.14e-144	postive
PRDX6-AS1	AC127035.1	0.734295	1.79e-84	postive
ZNF788P	AC127035.1	0.763549	4.03e-95	postive
CD160	AL133243.2	0.735499	6.97e-85	postive
CD160	AC107021.1	0.821026	2.25e-121	postive
RORA-AS1	AC107021.1	0.779528	1.29e-101	postive
ARLNC1	AC107021.1	0.758908	2.48e-93	postive
MROH7	AC107021.1	0.711856	3.21e-77	postive
SEMA6A-AS1	AC107021.1	0.842001	1.98e-133	postive
PRDX6-AS1	AC107021.1	0.726941	5.13e-82	postive
ZNF788P	AC107021.1	0.720758	5.18e-80	postive
CD160	NARF-IT1	0.701204	5.15e-74	postive
ACTA2	AC106786.1	0.718614	2.49e-79	postive
CCDC180	AL135999.1	0.711713	3.56e-77	postive
CD160	KCND3-IT1	0.841916	2.24e-133	postive
RORA-AS1	KCND3-IT1	0.828144	2.79e-125	postive
ARLNC1	KCND3-IT1	0.74457	4.78e-88	postive
MROH7	KCND3-IT1	0.743999	7.62e-88	postive
ADAMTSL4-AS2	KCND3-IT1	0.708484	3.45e-76	postive
SEMA6A-AS1	KCND3-IT1	0.86364	7.19e-148	postive
PRDX6-AS1	KCND3-IT1	0.72683	5.58e-82	postive
ZNF788P	KCND3-IT1	0.746492	9.81e-89	postive
SEMA6A-AS1	AL450263.1	0.764721	1.4e-95	postive
PRDX6-AS1	AL450263.1	0.760517	6.01e-94	postive
SYNPO	AC103591.4	0.72414	4.22e-81	postive
CUBN	AC105429.1	0.704392	5.86e-75	postive
CD160	AC105429.1	0.818723	3.8e-120	postive
C6orf163	AC105429.1	0.730397	3.68e-83	postive
RORA-AS1	AC105429.1	0.878485	2.69e-159	postive
ARLNC1	AC105429.1	0.73245	7.54e-84	postive
MROH7	AC105429.1	0.8374	1.22e-130	postive
ADAMTSL4-AS2	AC105429.1	0.827844	4.12e-125	postive
SEMA6A-AS1	AC105429.1	0.817511	1.65e-119	postive
ZNF788P	AC105429.1	0.750752	2.79e-90	postive
CD160	AL133247.1	0.840983	8.37e-133	postive
RORA-AS1	AL133247.1	0.883384	2.12e-163	postive
ARLNC1	AL133247.1	0.757708	7.1e-93	postive
MROH7	AL133247.1	0.834005	1.23e-128	postive
ADAMTSL4-AS2	AL133247.1	0.807491	2.1e-114	postive
SEMA6A-AS1	AL133247.1	0.82795	3.59e-125	postive
PRDX6-AS1	AL133247.1	0.713567	9.52e-78	postive
ZNF788P	AL133247.1	0.772706	8.87e-99	postive
CD160	AC011405.1	0.859508	6.3e-145	postive
HERC3	AC011405.1	0.718032	3.81e-79	postive
RORA-AS1	AC011405.1	0.827605	5.6e-125	postive
ARLNC1	AC011405.1	0.730855	2.59e-83	postive
MROH7	AC011405.1	0.74512	3.04e-88	postive
SEMA6A-AS1	AC011405.1	0.864017	3.84e-148	postive
PRDX6-AS1	AC011405.1	0.728895	1.16e-82	postive
ZNF788P	AC011405.1	0.734228	1.89e-84	postive
SEMA6A-AS1	AC126768.2	0.740244	1.6e-86	postive
CD160	AL110114.1	0.741973	3.97e-87	postive
MROH7	AL110114.1	0.713691	8.72e-78	postive
SEMA6A-AS1	AL110114.1	0.840145	2.71e-132	postive
PRDX6-AS1	AL110114.1	0.706454	1.41e-75	postive
ZNF788P	AL110114.1	0.704363	5.98e-75	postive
PSLNR	PSLNR	1	0	postive
CD160	AC004837.2	0.762761	8.16e-95	postive
SEMA6A-AS1	AC004837.2	0.776699	1.99e-100	postive
HERC3	FOXP1-IT1	0.744316	5.88e-88	postive
RMST	FOXP1-IT1	0.884401	2.82e-164	postive
AQP4-AS1	FOXP1-IT1	0.918958	3.78e-200	postive
HERC3	AC091544.7	0.73564	6.23e-85	postive
RMST	AC091544.7	0.845227	1.94e-135	postive
AQP4-AS1	AC091544.7	0.871322	1.32e-153	postive
CD160	AC092111.2	0.768874	3.15e-97	postive
RORA-AS1	AC092111.2	0.758184	4.68e-93	postive
SEMA6A-AS1	AC092111.2	0.705325	3.08e-75	postive
TRG-AS1	TRG-AS1	1	0	postive
CD160	AL121652.1	0.837005	2.1e-130	postive
HERC3	AL121652.1	0.736373	3.5e-85	postive
RORA-AS1	AL121652.1	0.849443	3.88e-138	postive
RMST	AL121652.1	0.721161	3.85e-80	postive
ADAMTSL4-AS2	AL121652.1	0.704329	6.12e-75	postive
SEMA6A-AS1	AL121652.1	0.808214	9.22e-115	postive
ZNF788P	AL121652.1	0.716081	1.57e-78	postive
CD160	AL162584.1	0.873761	1.67e-155	postive
HERC3	AL162584.1	0.727281	3.97e-82	postive
RORA-AS1	AL162584.1	0.87682	6.08e-158	postive
ARLNC1	AL162584.1	0.763367	4.74e-95	postive
MROH7	AL162584.1	0.760739	4.94e-94	postive
ADAMTSL4-AS2	AL162584.1	0.741898	4.22e-87	postive
SEMA6A-AS1	AL162584.1	0.863549	8.37e-148	postive
PRDX6-AS1	AL162584.1	0.728092	2.14e-82	postive
ZNF788P	AL162584.1	0.759869	1.07e-93	postive
CD160	AC003681.1	0.870172	1.01e-152	postive
LINC02614	AC003681.1	0.705119	3.56e-75	postive
RORA-AS1	AC003681.1	0.823172	1.56e-122	postive
ARLNC1	AC003681.1	0.775197	8.39e-100	postive
MROH7	AC003681.1	0.772854	7.72e-99	postive
ADAMTSL4-AS2	AC003681.1	0.745837	1.68e-88	postive
SEMA6A-AS1	AC003681.1	0.920394	5.69e-202	postive
PRDX6-AS1	AC003681.1	0.779326	1.57e-101	postive
ZNF788P	AC003681.1	0.788279	2.08e-105	postive
GAS1	GAS1RR	0.706371	1.5e-75	postive
AOX1	GAS1RR	0.725239	1.85e-81	postive
APOBEC3C	GAS1RR	0.764968	1.12e-95	postive
CD160	AL138689.2	0.780346	5.8e-102	postive
HERC3	AL138689.2	0.783144	3.67e-103	postive
RORA-AS1	AL138689.2	0.821209	1.8e-121	postive
RMST	AL138689.2	0.828763	1.25e-125	postive
SEMA6A-AS1	AL138689.2	0.727202	4.21e-82	postive
AQP4-AS1	AL138689.2	0.780745	3.92e-102	postive
CD160	LINC00882	0.834854	3.93e-129	postive
RORA-AS1	LINC00882	0.838238	3.85e-131	postive
ARLNC1	LINC00882	0.708165	4.3e-76	postive
MROH7	LINC00882	0.802314	6.98e-112	postive
ADAMTSL4-AS2	LINC00882	0.772724	8.72e-99	postive
SEMA6A-AS1	LINC00882	0.805275	2.58e-113	postive
PRDX6-AS1	LINC00882	0.733219	4.15e-84	postive
ZNF788P	LINC00882	0.747708	3.58e-89	postive
UCA1	AC016831.1	0.727654	2.99e-82	postive
CD160	LINC00954	0.911165	8.29e-191	postive
RORA-AS1	LINC00954	0.79429	4.05e-108	postive
MROH7	LINC00954	0.844807	3.56e-135	postive
ADAMTSL4-AS2	LINC00954	0.767406	1.22e-96	postive
SEMA6A-AS1	LINC00954	0.866608	4.82e-150	postive
PRDX6-AS1	LINC00954	0.74311	1.58e-87	postive
ZNF788P	LINC00954	0.750136	4.68e-90	postive
APLF	LINC00954	0.753808	2.07e-91	postive
CD160	AC068790.3	0.810225	9.14e-116	postive
LINC02614	AC068790.3	0.701028	5.8e-74	postive
HERC3	AC068790.3	0.703226	1.3e-74	postive
C6orf163	AC068790.3	0.713561	9.56e-78	postive
RORA-AS1	AC068790.3	0.806869	4.27e-114	postive
ARLNC1	AC068790.3	0.74496	3.47e-88	postive
MROH7	AC068790.3	0.72372	5.77e-81	postive
ADAMTSL4-AS2	AC068790.3	0.713399	1.07e-77	postive
SEMA6A-AS1	AC068790.3	0.874074	9.46e-156	postive
PRDX6-AS1	AC068790.3	0.749336	9.18e-90	postive
ZNF788P	AC068790.3	0.768375	5e-97	postive
CD160	AL121929.2	0.821052	2.18e-121	postive
RORA-AS1	AL121929.2	0.798947	2.78e-110	postive
ARLNC1	AL121929.2	0.745921	1.57e-88	postive
MROH7	AL121929.2	0.810348	7.92e-116	postive
ADAMTSL4-AS2	AL121929.2	0.776688	2.01e-100	postive
SEMA6A-AS1	AL121929.2	0.845669	1.02e-135	postive
PRDX6-AS1	AL121929.2	0.71822	3.32e-79	postive
ZNF788P	AL121929.2	0.746361	1.09e-88	postive
KCNMA1	MEF2C-AS1	0.716234	1.4e-78	postive
ADAMTSL4	MEF2C-AS1	0.724896	2.39e-81	postive
CACNA2D3	MEF2C-AS1	0.754876	8.28e-92	postive
CCDC83	AP003128.1	0.89314	3.76e-172	postive
CD160	AC068481.1	0.797829	9.3e-110	postive
RORA-AS1	AC068481.1	0.872538	1.51e-154	postive
ARLNC1	AC068481.1	0.791093	1.15e-106	postive
MROH7	AC068481.1	0.747196	5.47e-89	postive
ADAMTSL4-AS2	AC068481.1	0.789777	4.48e-106	postive
SEMA6A-AS1	AC068481.1	0.810755	4.94e-116	postive
PRDX6-AS1	AC068481.1	0.724479	3.27e-81	postive
ZNF788P	AC068481.1	0.762155	1.4e-94	postive
H2BC11	AL021807.1	0.904188	3.78e-183	postive
CD160	C3orf35	0.795095	1.73e-108	postive
C6orf163	C3orf35	0.775818	4.64e-100	postive
RORA-AS1	C3orf35	0.84141	4.58e-133	postive
MROH7	C3orf35	0.776214	3.17e-100	postive
ADAMTSL4-AS2	C3orf35	0.790901	1.4e-106	postive
SEMA6A-AS1	C3orf35	0.813462	2.08e-117	postive
ZNF788P	C3orf35	0.783077	3.93e-103	postive
SEMA6A-AS1	AL354989.1	0.73838	7.12e-86	postive
CD160	AC044810.2	0.846511	2.98e-136	postive
RORA-AS1	AC044810.2	0.791835	5.32e-107	postive
ARLNC1	AC044810.2	0.728173	2.01e-82	postive
MROH7	AC044810.2	0.853791	5.23e-141	postive
ADAMTSL4-AS2	AC044810.2	0.755677	4.15e-92	postive
SEMA6A-AS1	AC044810.2	0.836237	6.01e-130	postive
PRDX6-AS1	AC044810.2	0.717442	5.85e-79	postive
ZNF788P	AC044810.2	0.727435	3.53e-82	postive
CD160	AC020915.1	0.760874	4.38e-94	postive
C6orf163	AC020915.1	0.727582	3.16e-82	postive
RORA-AS1	AC020915.1	0.77494	1.07e-99	postive
ARLNC1	AC020915.1	0.720499	6.27e-80	postive
MROH7	AC020915.1	0.73223	8.94e-84	postive
ADAMTSL4-AS2	AC020915.1	0.736591	2.94e-85	postive
SEMA6A-AS1	AC020915.1	0.822747	2.66e-122	postive
PRDX6-AS1	AC020915.1	0.723315	7.8e-81	postive
ZNF788P	AC020915.1	0.77667	2.05e-100	postive
NHS	TMEM51-AS1	0.766247	3.51e-96	postive
CCDC180	AC009120.2	0.716962	8.29e-79	postive
CD160	AC010285.1	0.785174	4.83e-104	postive
HERC3	AC010285.1	0.709324	1.91e-76	postive
RORA-AS1	AC010285.1	0.728492	1.58e-82	postive
SEMA6A-AS1	AC010285.1	0.798325	5.45e-110	postive
PRDX6-AS1	AC010285.1	0.731058	2.21e-83	postive
ZNF788P	AC010285.1	0.712132	2.64e-77	postive
CD160	AC016683.1	0.88554	2.89e-165	postive
HERC3	AC016683.1	0.711388	4.48e-77	postive
RORA-AS1	AC016683.1	0.900722	1.47e-179	postive
ARLNC1	AC016683.1	0.78016	6.96e-102	postive
MROH7	AC016683.1	0.781433	1.99e-102	postive
ADAMTSL4-AS2	AC016683.1	0.774748	1.29e-99	postive
SEMA6A-AS1	AC016683.1	0.871587	8.26e-154	postive
PRDX6-AS1	AC016683.1	0.747955	2.91e-89	postive
ZNF788P	AC016683.1	0.781499	1.87e-102	postive
CD160	AC006160.1	0.867055	2.25e-150	postive
RORA-AS1	AC006160.1	0.932698	3.66e-219	postive
ARLNC1	AC006160.1	0.735656	6.16e-85	postive
MROH7	AC006160.1	0.777232	1.19e-100	postive
ADAMTSL4-AS2	AC006160.1	0.850495	8e-139	postive
SEMA6A-AS1	AC006160.1	0.814422	6.69e-118	postive
PRDX6-AS1	AC006160.1	0.715192	2.97e-78	postive
ZNF788P	AC006160.1	0.806537	6.22e-114	postive
SPEG	AP003071.4	0.777524	9.01e-101	postive
COL16A1	AP003071.4	0.710549	8.1e-77	postive
CCDC69	AP003071.4	0.70881	2.74e-76	postive
SLC24A3	AP003071.4	0.74215	3.44e-87	postive
KCNIP3	AP003071.4	0.729863	5.54e-83	postive
BMERB1	AP003071.4	0.725646	1.36e-81	postive
MRC2	AP003071.4	0.723966	4.8e-81	postive
CACNA2D3	AP003071.4	0.70421	6.64e-75	postive
KIFC3	AP003071.4	0.707863	5.31e-76	postive
ACTA2	AP003071.4	0.812706	5.07e-117	postive
SYNPO	AP003071.4	0.739468	2.98e-86	postive
PCAT1	PCAT1	1	0	postive
REG4	AC003988.1	0.711487	4.18e-77	postive
KCNMA1	AC005180.1	0.769717	1.45e-97	postive
EDNRA	AC005180.1	0.722293	1.67e-80	postive
ADRA1A	AC005180.1	0.755328	5.61e-92	postive
SHISAL1	AC005180.1	0.773448	4.41e-99	postive
ARHGAP20	AC005180.1	0.763549	4.03e-95	postive
MYLK	AC005180.1	0.9051	4.07e-184	postive
CCDC69	AC005180.1	0.748354	2.09e-89	postive
SLC24A3	AC005180.1	0.751287	1.77e-90	postive
BMERB1	AC005180.1	0.724309	3.72e-81	postive
UBXN10	AC005180.1	0.775574	5.85e-100	postive
ATP1A2	AC005180.1	0.766056	4.17e-96	postive
ACTA2	AC005180.1	0.775929	4.17e-100	postive
CD160	BACH1-AS1	0.842621	8.21e-134	postive
RORA-AS1	BACH1-AS1	0.856191	1.24e-142	postive
ARLNC1	BACH1-AS1	0.702534	2.09e-74	postive
MROH7	BACH1-AS1	0.778288	4.3e-101	postive
ADAMTSL4-AS2	BACH1-AS1	0.810133	1.02e-115	postive
SEMA6A-AS1	BACH1-AS1	0.821831	8.31e-122	postive
PRDX6-AS1	BACH1-AS1	0.708917	2.55e-76	postive
ZNF788P	BACH1-AS1	0.734293	1.79e-84	postive
CD160	AL024497.2	0.791493	7.59e-107	postive
RORA-AS1	AL024497.2	0.73311	4.51e-84	postive
ARLNC1	AL024497.2	0.739533	2.83e-86	postive
MROH7	AL024497.2	0.780182	6.81e-102	postive
SEMA6A-AS1	AL024497.2	0.851904	9.45e-140	postive
PRDX6-AS1	AL024497.2	0.719107	1.74e-79	postive
ZNF788P	AL024497.2	0.727451	3.49e-82	postive
CD160	AC093675.2	0.852583	3.35e-140	postive
HERC3	AC093675.2	0.752648	5.58e-91	postive
RORA-AS1	AC093675.2	0.916775	1.94e-197	postive
RMST	AC093675.2	0.709077	2.28e-76	postive
ARLNC1	AC093675.2	0.721008	4.31e-80	postive
MROH7	AC093675.2	0.71502	3.36e-78	postive
ADAMTSL4-AS2	AC093675.2	0.740189	1.67e-86	postive
SEMA6A-AS1	AC093675.2	0.811625	1.8e-116	postive
ZNF788P	AC093675.2	0.748523	1.81e-89	postive
SEMA6A-AS1	AC130456.1	0.789414	6.5e-106	postive
CD160	AC138393.3	0.76076	4.85e-94	postive
SEMA6A-AS1	AC138393.3	0.824802	2.01e-123	postive
PRDX6-AS1	AC138393.3	0.76324	5.31e-95	postive
ZNF788P	AC138393.3	0.725091	2.07e-81	postive
CD160	AP002336.1	0.773074	6.27e-99	postive
HERC3	AP002336.1	0.726221	8.84e-82	postive
RORA-AS1	AP002336.1	0.739793	2.3e-86	postive
RMST	AP002336.1	0.720318	7.17e-80	postive
SEMA6A-AS1	AP002336.1	0.814125	9.51e-118	postive
CD160	AC002401.2	0.712593	1.91e-77	postive
MROH7	AC002401.2	0.708655	3.06e-76	postive
SEMA6A-AS1	AC002401.2	0.724423	3.41e-81	postive
CD160	BACH1-IT2	0.858388	3.81e-144	postive
RORA-AS1	BACH1-IT2	0.884396	2.85e-164	postive
ARLNC1	BACH1-IT2	0.748466	1.9e-89	postive
MROH7	BACH1-IT2	0.797817	9.42e-110	postive
ADAMTSL4-AS2	BACH1-IT2	0.796723	3.05e-109	postive
SEMA6A-AS1	BACH1-IT2	0.859197	1.04e-144	postive
PRDX6-AS1	BACH1-IT2	0.731481	1.6e-83	postive
ZNF788P	BACH1-IT2	0.765902	4.8e-96	postive
CD160	AC092745.4	0.809286	2.7e-115	postive
RORA-AS1	AC092745.4	0.727043	4.75e-82	postive
MROH7	AC092745.4	0.829962	2.63e-126	postive
ADAMTSL4-AS2	AC092745.4	0.784111	1.4e-103	postive
SEMA6A-AS1	AC092745.4	0.764185	2.27e-95	postive
ZNF788P	AC092745.4	0.723009	9.8e-81	postive
CD160	DOCK4-AS1	0.860827	7.42e-146	postive
HERC3	DOCK4-AS1	0.711128	5.38e-77	postive
RORA-AS1	DOCK4-AS1	0.940354	1.36e-231	postive
ARLNC1	DOCK4-AS1	0.739199	3.7e-86	postive
MROH7	DOCK4-AS1	0.751216	1.88e-90	postive
ADAMTSL4-AS2	DOCK4-AS1	0.779864	9.29e-102	postive
SEMA6A-AS1	DOCK4-AS1	0.806668	5.36e-114	postive
ZNF788P	DOCK4-AS1	0.764099	2.45e-95	postive
NIPSNAP3B	AL008729.2	0.725761	1.25e-81	postive
CD160	AC036176.3	0.784448	1e-103	postive
RORA-AS1	AC036176.3	0.757095	1.21e-92	postive
MROH7	AC036176.3	0.806622	5.64e-114	postive
ADAMTSL4-AS2	AC036176.3	0.816416	6.19e-119	postive
SEMA6A-AS1	AC036176.3	0.720582	5.9e-80	postive
SDCBP2	LINC02636	0.860328	1.67e-145	postive
CCDC180	UBOX5-AS1	0.734347	1.72e-84	postive
SEMA6A-AS1	UBOX5-AS1	0.770745	5.57e-98	postive
CD160	EZR-AS1	0.789298	7.32e-106	postive
RORA-AS1	EZR-AS1	0.823399	1.17e-122	postive
ARLNC1	EZR-AS1	0.728109	2.12e-82	postive
MROH7	EZR-AS1	0.725995	1.05e-81	postive
ADAMTSL4-AS2	EZR-AS1	0.718271	3.2e-79	postive
SEMA6A-AS1	EZR-AS1	0.820579	3.91e-121	postive
PRDX6-AS1	EZR-AS1	0.735183	8.93e-85	postive
ZNF788P	EZR-AS1	0.752817	4.84e-91	postive
CD160	AC009974.2	0.827157	9.96e-125	postive
RORA-AS1	AC009974.2	0.817042	2.91e-119	postive
ARLNC1	AC009974.2	0.768785	3.42e-97	postive
MROH7	AC009974.2	0.816942	3.29e-119	postive
ADAMTSL4-AS2	AC009974.2	0.777314	1.1e-100	postive
SEMA6A-AS1	AC009974.2	0.852906	2.04e-140	postive
PRDX6-AS1	AC009974.2	0.726893	5.32e-82	postive
ZNF788P	AC009974.2	0.759373	1.65e-93	postive
CD160	AC004494.1	0.831202	5.15e-127	postive
RORA-AS1	AC004494.1	0.738173	8.39e-86	postive
HLA-DQB1-AS1	AC004494.1	0.709564	1.62e-76	postive
ARLNC1	AC004494.1	0.707272	8.02e-76	postive
MROH7	AC004494.1	0.741401	6.31e-87	postive
ADAMTSL4-AS2	AC004494.1	0.777041	1.43e-100	postive
SEMA6A-AS1	AC004494.1	0.85546	3.91e-142	postive
PRDX6-AS1	AC004494.1	0.739415	3.12e-86	postive
ZNF788P	AC004494.1	0.776319	2.87e-100	postive
CD160	AL031280.1	0.763425	4.5e-95	postive
RORA-AS1	AL031280.1	0.728782	1.27e-82	postive
SEMA6A-AS1	AL031280.1	0.798939	2.81e-110	postive
PRDX6-AS1	AL031280.1	0.705729	2.34e-75	postive
CD160	AC087392.2	0.795235	1.49e-108	postive
RORA-AS1	AC087392.2	0.852107	6.93e-140	postive
ARLNC1	AC087392.2	0.711281	4.83e-77	postive
MROH7	AC087392.2	0.791656	6.4e-107	postive
ADAMTSL4-AS2	AC087392.2	0.773068	6.31e-99	postive
SEMA6A-AS1	AC087392.2	0.76704	1.7e-96	postive
CD160	AC010275.1	0.786091	1.92e-104	postive
RORA-AS1	AC010275.1	0.884739	1.44e-164	postive
MROH7	AC010275.1	0.707537	6.67e-76	postive
ADAMTSL4-AS2	AC010275.1	0.756214	2.61e-92	postive
AKR1C1	AL391427.1	0.850238	1.18e-138	postive
AKR1C2	AL391427.1	0.836647	3.44e-130	postive
CMYA5	AC069360.1	0.873296	3.87e-155	postive
SYNPO2L	AC069360.1	0.838582	2.4e-131	postive
CA3	AC069360.1	0.898195	5.01e-177	postive
ALPK2	AC069360.1	0.70501	3.83e-75	postive
TBX15	AC069360.1	0.795265	1.44e-108	postive
NEB	AC069360.1	0.86397	4.15e-148	postive
FNDC5	AC069360.1	0.773322	4.97e-99	postive
EXTL1	AC069360.1	0.885889	1.43e-165	postive
ANKRD1	AC069360.1	0.870463	6.04e-153	postive
MYOZ1	AC069360.1	0.876202	1.92e-157	postive
CD160	CEP250-AS1	0.79429	4.05e-108	postive
RORA-AS1	CEP250-AS1	0.80463	5.32e-113	postive
MROH7	CEP250-AS1	0.76787	7.95e-97	postive
ADAMTSL4-AS2	CEP250-AS1	0.821017	2.28e-121	postive
SEMA6A-AS1	CEP250-AS1	0.706663	1.22e-75	postive
ZNF788P	CEP250-AS1	0.706825	1.09e-75	postive
CD160	AC011239.1	0.872946	7.26e-155	postive
RORA-AS1	AC011239.1	0.869415	3.79e-152	postive
ARLNC1	AC011239.1	0.720212	7.75e-80	postive
MROH7	AC011239.1	0.850106	1.44e-138	postive
ADAMTSL4-AS2	AC011239.1	0.811911	1.29e-116	postive
SEMA6A-AS1	AC011239.1	0.81612	8.83e-119	postive
ZNF788P	AC011239.1	0.743487	1.16e-87	postive
APLF	AC011239.1	0.711545	4.01e-77	postive
CD160	AC005803.1	0.859342	8.23e-145	postive
RORA-AS1	AC005803.1	0.984628	0	postive
ARLNC1	AC005803.1	0.742369	2.88e-87	postive
MROH7	AC005803.1	0.804062	1e-112	postive
ADAMTSL4-AS2	AC005803.1	0.853698	6.04e-141	postive
SEMA6A-AS1	AC005803.1	0.775145	8.81e-100	postive
ZNF788P	AC005803.1	0.769249	2.23e-97	postive
TSPOAP1	AL109811.2	0.703901	8.21e-75	postive
REG4	LINC02696	0.921718	1.11e-203	postive
PREX2	AC109587.1	0.728057	2.2e-82	postive
CACNA1C	AC109587.1	0.706771	1.14e-75	postive
SYNE1	AC109587.1	0.719216	1.61e-79	postive
PREX2	LINC02580	0.724829	2.52e-81	postive
CD160	RHOXF1-AS1	0.822278	4.77e-122	postive
RORA-AS1	RHOXF1-AS1	0.787256	5.9e-105	postive
MROH7	RHOXF1-AS1	0.773676	3.55e-99	postive
ADAMTSL4-AS2	RHOXF1-AS1	0.754951	7.76e-92	postive
SEMA6A-AS1	RHOXF1-AS1	0.784278	1.19e-103	postive
RORA-AS1	AC104031.1	0.797361	1.54e-109	postive
ADAMTSL4-AS2	AC104031.1	0.701781	3.48e-74	postive
CD160	DIRC3	0.845839	7.94e-136	postive
RORA-AS1	DIRC3	0.907446	1.19e-186	postive
ARLNC1	DIRC3	0.734185	1.95e-84	postive
MROH7	DIRC3	0.854726	1.23e-141	postive
ADAMTSL4-AS2	DIRC3	0.859978	2.95e-145	postive
SEMA6A-AS1	DIRC3	0.79144	8.02e-107	postive
ZNF788P	DIRC3	0.761493	2.53e-94	postive
CUBN	AC090739.1	0.702656	1.92e-74	postive
CD160	AC090739.1	0.845673	1.01e-135	postive
C6orf163	AC090739.1	0.705679	2.42e-75	postive
RORA-AS1	AC090739.1	0.845232	1.92e-135	postive
ARLNC1	AC090739.1	0.716996	8.09e-79	postive
MROH7	AC090739.1	0.82977	3.38e-126	postive
ADAMTSL4-AS2	AC090739.1	0.857521	1.52e-143	postive
SEMA6A-AS1	AC090739.1	0.837792	7.14e-131	postive
PRDX6-AS1	AC090739.1	0.71354	9.71e-78	postive
ZNF788P	AC090739.1	0.759915	1.02e-93	postive
CD160	AC019118.1	0.748826	1.41e-89	postive
RORA-AS1	AC019118.1	0.752719	5.25e-91	postive
SEMA6A-AS1	AC019118.1	0.763907	2.92e-95	postive
CD160	AC011373.1	0.708927	2.53e-76	postive
SEMA6A-AS1	AC011373.1	0.790366	2.44e-106	postive
CD160	AC011389.1	0.745223	2.79e-88	postive
ARLNC1	AC011389.1	0.702466	2.19e-74	postive
MROH7	AC011389.1	0.718316	3.1e-79	postive
SEMA6A-AS1	AC011389.1	0.826856	1.47e-124	postive
CD160	AC090617.5	0.843202	3.58e-134	postive
RORA-AS1	AC090617.5	0.906343	1.89e-185	postive
ARLNC1	AC090617.5	0.71822	3.32e-79	postive
MROH7	AC090617.5	0.83856	2.47e-131	postive
ADAMTSL4-AS2	AC090617.5	0.904622	1.31e-183	postive
SEMA6A-AS1	AC090617.5	0.767866	7.98e-97	postive
ZNF788P	AC090617.5	0.726176	9.14e-82	postive
CD160	LINC01798	0.792996	1.58e-107	postive
RORA-AS1	LINC01798	0.70212	2.77e-74	postive
MROH7	LINC01798	0.789359	6.88e-106	postive
SEMA6A-AS1	LINC01798	0.8344	7.25e-129	postive
ZNF788P	LINC01798	0.710586	7.89e-77	postive
TSLP	AC026469.1	0.726964	5.04e-82	postive
CD160	AC010320.3	0.778873	2.44e-101	postive
RORA-AS1	AC010320.3	0.784681	7.92e-104	postive
ADAMTSL4-AS2	AC010320.3	0.707498	6.85e-76	postive
SEMA6A-AS1	AC010320.3	0.779472	1.36e-101	postive
ZNF788P	AC010320.3	0.713231	1.21e-77	postive
RORA-AS1	AC026368.1	0.718761	2.24e-79	postive
SEMA6A-AS1	AC026368.1	0.742656	2.28e-87	postive
RORA-AS1	AC130469.1	0.738126	8.72e-86	postive
ADAMTSL4-AS2	AC130469.1	0.749861	5.91e-90	postive
RORA-AS1	AL391335.1	0.733984	2.28e-84	postive
MROH7	AL391335.1	0.705132	3.52e-75	postive
SPEG	MRGPRF-AS1	0.812289	8.26e-117	postive
KCNIP3	MRGPRF-AS1	0.716638	1.05e-78	postive
LINC01778	MRGPRF-AS1	0.700675	7.37e-74	postive
CACNA2D3	MRGPRF-AS1	0.704502	5.43e-75	postive
ACTG2	MRGPRF-AS1	0.707396	7.36e-76	postive
ACTA2	MRGPRF-AS1	0.740258	1.58e-86	postive
CUBN	PLCG1-AS1	0.716186	1.45e-78	postive
CD160	PLCG1-AS1	0.843696	1.76e-134	postive
LINC02614	PLCG1-AS1	0.728204	1.97e-82	postive
C6orf163	PLCG1-AS1	0.722059	1.98e-80	postive
RORA-AS1	PLCG1-AS1	0.777979	5.8e-101	postive
ARLNC1	PLCG1-AS1	0.701639	3.84e-74	postive
MROH7	PLCG1-AS1	0.746023	1.45e-88	postive
ADAMTSL4-AS2	PLCG1-AS1	0.753012	4.09e-91	postive
SEMA6A-AS1	PLCG1-AS1	0.884387	2.91e-164	postive
PRDX6-AS1	PLCG1-AS1	0.815903	1.15e-118	postive
ZNF788P	PLCG1-AS1	0.807497	2.09e-114	postive
CD160	AC008119.1	0.858692	2.34e-144	postive
HERC3	AC008119.1	0.718852	2.1e-79	postive
RORA-AS1	AC008119.1	0.770999	4.39e-98	postive
ARLNC1	AC008119.1	0.719216	1.61e-79	postive
SEMA6A-AS1	AC008119.1	0.88506	7.57e-165	postive
PRDX6-AS1	AC008119.1	0.76239	1.14e-94	postive
ZNF788P	AC008119.1	0.770219	9.08e-98	postive
CD160	WASHC5-AS1	0.822283	4.74e-122	postive
RORA-AS1	WASHC5-AS1	0.748228	2.32e-89	postive
ARLNC1	WASHC5-AS1	0.723841	5.27e-81	postive
SEMA6A-AS1	WASHC5-AS1	0.873278	3.99e-155	postive
PRDX6-AS1	WASHC5-AS1	0.755904	3.41e-92	postive
ZNF788P	WASHC5-AS1	0.737806	1.12e-85	postive
SEMA6A-AS1	AC008264.2	0.730656	3.01e-83	postive
MANEA	EBLN3P	0.713114	1.31e-77	postive
TMTC2	EBLN3P	0.75472	9.47e-92	postive
GFM1	EBLN3P	0.705405	2.92e-75	postive
CDHR1	AP001994.2	0.726384	7.81e-82	postive
CD160	PHKA1-AS1	0.71983	1.03e-79	postive
RORA-AS1	PHKA1-AS1	0.775288	7.69e-100	postive
SEMA6A-AS1	AC010210.1	0.720536	6.1e-80	postive
UCA1	AL359844.1	0.734176	1.97e-84	postive
C6orf163	AC015813.1	0.701797	3.45e-74	postive
CCDC180	AC015813.1	0.716545	1.12e-78	postive
CD160	AC005837.4	0.779647	1.15e-101	postive
RORA-AS1	AC005837.4	0.703162	1.36e-74	postive
ARLNC1	AC005837.4	0.724838	2.5e-81	postive
MROH7	AC005837.4	0.747576	3.99e-89	postive
SEMA6A-AS1	AC005837.4	0.846972	1.51e-136	postive
PRDX6-AS1	AC005837.4	0.709555	1.63e-76	postive
CD160	AC005096.1	0.866997	2.48e-150	postive
RORA-AS1	AC005096.1	0.891861	5.89e-171	postive
ARLNC1	AC005096.1	0.782247	8.93e-103	postive
MROH7	AC005096.1	0.822721	2.75e-122	postive
ADAMTSL4-AS2	AC005096.1	0.808185	9.53e-115	postive
SEMA6A-AS1	AC005096.1	0.862472	4.99e-147	postive
PRDX6-AS1	AC005096.1	0.740168	1.7e-86	postive
ZNF788P	AC005096.1	0.793224	1.24e-107	postive
CD160	AC073487.1	0.821404	1.41e-121	postive
C6orf163	AC073487.1	0.7291	9.93e-83	postive
RORA-AS1	AC073487.1	0.901033	7.06e-180	postive
ARLNC1	AC073487.1	0.724269	3.83e-81	postive
MROH7	AC073487.1	0.775973	4e-100	postive
ADAMTSL4-AS2	AC073487.1	0.82962	4.11e-126	postive
SEMA6A-AS1	AC073487.1	0.806425	7.06e-114	postive
PRDX6-AS1	AC073487.1	0.713649	8.98e-78	postive
ZNF788P	AC073487.1	0.795499	1.13e-108	postive
RORA-AS1	LINC01990	0.748666	1.61e-89	postive
LAMA1	LINC01698	0.865872	1.69e-149	postive
CD160	AC234775.2	0.731065	2.2e-83	postive
RORA-AS1	AC234775.2	0.778796	2.63e-101	postive
ADAMTSL4-AS2	AC234775.2	0.707652	6.15e-76	postive
CD160	AC025442.2	0.721581	2.83e-80	postive
HERC3	AC025442.2	0.718799	2.18e-79	postive
RORA-AS1	AC025442.2	0.73063	3.07e-83	postive
RMST	AC025442.2	0.816885	3.52e-119	postive
SEMA6A-AS1	AC025442.2	0.710262	9.91e-77	postive
AQP4-AS1	AC025442.2	0.792164	3.77e-107	postive
ZNF503-AS1	ZNF503-AS1	1	0	postive
CD160	AC025280.3	0.841672	3.16e-133	postive
RORA-AS1	AC025280.3	0.955135	4.29e-261	postive
ARLNC1	AC025280.3	0.762278	1.26e-94	postive
MROH7	AC025280.3	0.834421	7.06e-129	postive
ADAMTSL4-AS2	AC025280.3	0.864785	1.06e-148	postive
SEMA6A-AS1	AC025280.3	0.789872	4.06e-106	postive
ZNF788P	AC025280.3	0.774408	1.78e-99	postive
PLEKHO1	AL513217.1	0.723026	9.68e-81	postive
SPEG	AL513217.1	0.71246	2.09e-77	postive
ACTG2	AL513217.1	0.766003	4.38e-96	postive
CD160	LINC02649	0.814008	1.09e-117	postive
RORA-AS1	LINC02649	0.788138	2.4e-105	postive
MROH7	LINC02649	0.897471	2.59e-176	postive
ADAMTSL4-AS2	LINC02649	0.7802	6.69e-102	postive
SEMA6A-AS1	LINC02649	0.774582	1.51e-99	postive
ZNF788P	LINC02649	0.705263	3.22e-75	postive
DAB1	AC097634.3	0.817447	1.79e-119	postive
KCNMA1	MAGI2-AS3	0.784134	1.37e-103	postive
EDNRA	MAGI2-AS3	0.760808	4.65e-94	postive
ADRA1A	MAGI2-AS3	0.77853	3.4e-101	postive
SH3PXD2A	MAGI2-AS3	0.756263	2.5e-92	postive
PREX2	MAGI2-AS3	0.805762	1.49e-113	postive
ARHGAP20	MAGI2-AS3	0.794193	4.49e-108	postive
CACNA1C	MAGI2-AS3	0.754669	9.89e-92	postive
MYLK	MAGI2-AS3	0.712275	2.39e-77	postive
SYNE1	MAGI2-AS3	0.792545	2.53e-107	postive
MCC	MAGI2-AS3	0.768782	3.43e-97	postive
PLEKHA2	MAGI2-AS3	0.742073	3.66e-87	postive
NHS	MAGI2-AS3	0.819064	2.51e-120	postive
SLC24A3	MAGI2-AS3	0.717073	7.65e-79	postive
MAML2	MAGI2-AS3	0.716898	8.68e-79	postive
ITGA1	MAGI2-AS3	0.774014	2.58e-99	postive
ARHGEF6	MAGI2-AS3	0.708707	2.95e-76	postive
WWTR1	MAGI2-AS3	0.725459	1.57e-81	postive
CD160	AC012157.2	0.835065	2.96e-129	postive
RORA-AS1	AC012157.2	0.767241	1.41e-96	postive
ARLNC1	AC012157.2	0.714373	5.35e-78	postive
MROH7	AC012157.2	0.71166	3.69e-77	postive
ADAMTSL4-AS2	AC012157.2	0.718145	3.51e-79	postive
SEMA6A-AS1	AC012157.2	0.856375	9.29e-143	postive
PRDX6-AS1	AC012157.2	0.721706	2.58e-80	postive
ZNF788P	AC012157.2	0.752429	6.73e-91	postive
CD160	AC078883.2	0.786194	1.73e-104	postive
RORA-AS1	AC078883.2	0.832856	5.75e-128	postive
SEMA6A-AS1	AC078883.2	0.775553	5.97e-100	postive
ZNF788P	AC078883.2	0.71718	7.08e-79	postive
CD160	AP003065.1	0.733467	3.42e-84	postive
RORA-AS1	AP003065.1	0.856008	1.66e-142	postive
MROH7	AP003065.1	0.740058	1.86e-86	postive
ADAMTSL4-AS2	AP003065.1	0.839095	1.17e-131	postive
ZNF788P	AP003065.1	0.714324	5.54e-78	postive
CD160	AC108058.1	0.861283	3.52e-146	postive
RORA-AS1	AC108058.1	0.881903	3.85e-162	postive
ARLNC1	AC108058.1	0.769247	2.24e-97	postive
MROH7	AC108058.1	0.869311	4.55e-152	postive
ADAMTSL4-AS2	AC108058.1	0.866043	1.26e-149	postive
SEMA6A-AS1	AC108058.1	0.83667	3.33e-130	postive
PRDX6-AS1	AC108058.1	0.708619	3.14e-76	postive
ZNF788P	AC108058.1	0.769533	1.71e-97	postive
CD160	AC099811.5	0.890624	8.14e-170	postive
RORA-AS1	AC099811.5	0.959542	7.4e-272	postive
ARLNC1	AC099811.5	0.768544	4.27e-97	postive
MROH7	AC099811.5	0.807454	2.2e-114	postive
ADAMTSL4-AS2	AC099811.5	0.83553	1.57e-129	postive
SEMA6A-AS1	AC099811.5	0.831292	4.57e-127	postive
PRDX6-AS1	AC099811.5	0.717282	6.57e-79	postive
ZNF788P	AC099811.5	0.788065	2.59e-105	postive
CD160	AC244093.5	0.862259	7.1e-147	postive
HERC3	AC244093.5	0.726143	9.38e-82	postive
RORA-AS1	AC244093.5	0.811654	1.74e-116	postive
ARLNC1	AC244093.5	0.731421	1.67e-83	postive
MROH7	AC244093.5	0.718106	3.61e-79	postive
ADAMTSL4-AS2	AC244093.5	0.708207	4.18e-76	postive
SEMA6A-AS1	AC244093.5	0.881712	5.58e-162	postive
PRDX6-AS1	AC244093.5	0.756483	2.06e-92	postive
ZNF788P	AC244093.5	0.76999	1.12e-97	postive
RORA-AS1	AC023480.1	0.742731	2.14e-87	postive
MCC	AC015922.2	0.751013	2.24e-90	postive
CD160	AC034234.1	0.756333	2.35e-92	postive
HERC3	AC034234.1	0.752435	6.69e-91	postive
RORA-AS1	AC034234.1	0.810281	8.56e-116	postive
RMST	AC034234.1	0.812541	6.15e-117	postive
SEMA6A-AS1	AC034234.1	0.709145	2.17e-76	postive
AQP4-AS1	AC034234.1	0.745181	2.89e-88	postive
CD160	AC024267.5	0.767484	1.13e-96	postive
RORA-AS1	AC024267.5	0.860693	9.24e-146	postive
ADAMTSL4-AS2	AC024267.5	0.729387	7.98e-83	postive
SEMA6A-AS1	AC024267.5	0.739523	2.86e-86	postive
ZNF788P	AC024267.5	0.734695	1.31e-84	postive
CD160	AC078852.1	0.792674	2.21e-107	postive
RORA-AS1	AC078852.1	0.721805	2.39e-80	postive
ARLNC1	AC078852.1	0.706578	1.3e-75	postive
SEMA6A-AS1	AC078852.1	0.842999	4.79e-134	postive
PRDX6-AS1	AC078852.1	0.720342	7.04e-80	postive
CD160	AC012409.3	0.750952	2.35e-90	postive
MROH7	AC012409.3	0.761403	2.74e-94	postive
SEMA6A-AS1	AC012409.3	0.768058	6.69e-97	postive
CD160	AC063944.1	0.811904	1.3e-116	postive
RORA-AS1	AC063944.1	0.752954	4.3e-91	postive
ARLNC1	AC063944.1	0.743246	1.41e-87	postive
MROH7	AC063944.1	0.789313	7.22e-106	postive
ADAMTSL4-AS2	AC063944.1	0.711662	3.69e-77	postive
SEMA6A-AS1	AC063944.1	0.848524	1.53e-137	postive
PRDX6-AS1	AC063944.1	0.732262	8.72e-84	postive
ZNF788P	AC063944.1	0.732059	1.02e-83	postive
CD160	AL357874.2	0.825381	9.63e-124	postive
RORA-AS1	AL357874.2	0.762254	1.28e-94	postive
MROH7	AL357874.2	0.771444	2.9e-98	postive
ADAMTSL4-AS2	AL357874.2	0.712104	2.7e-77	postive
SEMA6A-AS1	AL357874.2	0.834328	7.99e-129	postive
PRDX6-AS1	AL357874.2	0.721963	2.13e-80	postive
ZNF788P	AL357874.2	0.730708	2.9e-83	postive
CCDC180	AL117350.1	0.715445	2.48e-78	postive
SEMA6A-AS1	AL117350.1	0.70465	4.91e-75	postive
CD160	AL136988.2	0.842432	1.07e-133	postive
RORA-AS1	AL136988.2	0.764336	1.98e-95	postive
ARLNC1	AL136988.2	0.73095	2.4e-83	postive
MROH7	AL136988.2	0.709811	1.36e-76	postive
ADAMTSL4-AS2	AL136988.2	0.745732	1.84e-88	postive
SEMA6A-AS1	AL136988.2	0.863834	5.21e-148	postive
PRDX6-AS1	AL136988.2	0.751426	1.58e-90	postive
ZNF788P	AL136988.2	0.767276	1.37e-96	postive
CD160	AC138956.2	0.815462	1.94e-118	postive
RORA-AS1	AC138956.2	0.759383	1.64e-93	postive
ADAMTSL4-AS2	AC138956.2	0.726509	7.11e-82	postive
SEMA6A-AS1	AC138956.2	0.856832	4.52e-143	postive
PRDX6-AS1	AC138956.2	0.774992	1.02e-99	postive
ZNF788P	AC138956.2	0.77141	2.99e-98	postive
CD160	AL133227.1	0.872346	2.13e-154	postive
LINC02614	AL133227.1	0.701457	4.34e-74	postive
RORA-AS1	AL133227.1	0.802017	9.7e-112	postive
ARLNC1	AL133227.1	0.753638	2.4e-91	postive
MROH7	AL133227.1	0.778102	5.15e-101	postive
ADAMTSL4-AS2	AL133227.1	0.718644	2.44e-79	postive
SEMA6A-AS1	AL133227.1	0.9011	6.04e-180	postive
PRDX6-AS1	AL133227.1	0.775607	5.67e-100	postive
ZNF788P	AL133227.1	0.778959	2.24e-101	postive
SEMA6A-AS1	AL080317.1	0.719677	1.15e-79	postive
CD160	AC019080.1	0.804751	4.65e-113	postive
MROH7	AC019080.1	0.749975	5.36e-90	postive
ADAMTSL4-AS2	AC019080.1	0.704936	4.03e-75	postive
SEMA6A-AS1	AC019080.1	0.803188	2.66e-112	postive
ZNF788P	AC019080.1	0.732693	6.24e-84	postive
SEMA6A-AS1	AC018766.1	0.769599	1.61e-97	postive
CD160	AC092428.1	0.788918	1.08e-105	postive
RORA-AS1	AC092428.1	0.769663	1.52e-97	postive
MROH7	AC092428.1	0.77858	3.24e-101	postive
SEMA6A-AS1	AC092428.1	0.780635	4.37e-102	postive
MMP16	EDIL3-DT	0.701354	4.66e-74	postive
PREX2	EDIL3-DT	0.716625	1.06e-78	postive
CCDC80	EDIL3-DT	0.702312	2.43e-74	postive
SYNE1	AC005670.3	0.727506	3.34e-82	postive
ABCA1	AC005670.3	0.745222	2.8e-88	postive
CD160	AC104350.1	0.764868	1.23e-95	postive
HERC3	AC104350.1	0.785958	2.19e-104	postive
RORA-AS1	AC104350.1	0.786794	9.43e-105	postive
RMST	AC104350.1	0.840867	9.85e-133	postive
AQP4-AS1	AC104350.1	0.836978	2.18e-130	postive
RORA-AS1	AL592430.1	0.730468	3.48e-83	postive
CD160	INTS9-AS1	0.878257	4.13e-159	postive
C6orf163	INTS9-AS1	0.711096	5.51e-77	postive
RORA-AS1	INTS9-AS1	0.952613	2.07e-255	postive
ARLNC1	INTS9-AS1	0.747627	3.83e-89	postive
MROH7	INTS9-AS1	0.774243	2.08e-99	postive
ADAMTSL4-AS2	INTS9-AS1	0.82669	1.81e-124	postive
SEMA6A-AS1	INTS9-AS1	0.817103	2.71e-119	postive
PRDX6-AS1	INTS9-AS1	0.703149	1.37e-74	postive
ZNF788P	INTS9-AS1	0.792191	3.67e-107	postive
SEMA6A-AS1	AC097105.1	0.791225	1e-106	postive
KCNMA1	FENDRR	0.808651	5.6e-115	postive
EDNRA	FENDRR	0.718449	2.81e-79	postive
ADRA1A	FENDRR	0.792756	2.03e-107	postive
SPEG	FENDRR	0.787739	3.61e-105	postive
ARHGAP20	FENDRR	0.744052	7.3e-88	postive
MYLK	FENDRR	0.805158	2.94e-113	postive
TSLP	FENDRR	0.733775	2.69e-84	postive
CCDC69	FENDRR	0.806051	1.08e-113	postive
SLC24A3	FENDRR	0.819773	1.05e-120	postive
PIPOX	FENDRR	0.709891	1.29e-76	postive
KCNIP3	FENDRR	0.763703	3.5e-95	postive
LINC01778	FENDRR	0.741264	7.04e-87	postive
ITGA1	FENDRR	0.768242	5.65e-97	postive
BMERB1	FENDRR	0.790744	1.65e-106	postive
UBXN10	FENDRR	0.808087	1.07e-114	postive
CACNA2D3	FENDRR	0.745014	3.32e-88	postive
ATP1A2	FENDRR	0.746311	1.14e-88	postive
STAC	FENDRR	0.812559	6.02e-117	postive
FAM107A	FENDRR	0.701534	4.12e-74	postive
ACTA2	FENDRR	0.823082	1.75e-122	postive
CBLN2	AC098483.1	0.835757	1.16e-129	postive
CUBN	AL451123.1	0.726296	8.36e-82	postive
CD160	AL451123.1	0.824139	4.63e-123	postive
RORA-AS1	AL451123.1	0.730495	3.41e-83	postive
ARLNC1	AL451123.1	0.736949	2.22e-85	postive
MROH7	AL451123.1	0.741552	5.58e-87	postive
SEMA6A-AS1	AL451123.1	0.916626	2.94e-197	postive
PRDX6-AS1	AL451123.1	0.784196	1.29e-103	postive
ZNF788P	AL451123.1	0.771528	2.68e-98	postive
CD160	PRR26	0.870455	6.12e-153	postive
HERC3	PRR26	0.719629	1.19e-79	postive
RORA-AS1	PRR26	0.879337	5.36e-160	postive
ARLNC1	PRR26	0.734928	1.09e-84	postive
MROH7	PRR26	0.781791	1.4e-102	postive
ADAMTSL4-AS2	PRR26	0.764848	1.25e-95	postive
SEMA6A-AS1	PRR26	0.847144	1.17e-136	postive
PRDX6-AS1	PRR26	0.721731	2.53e-80	postive
ZNF788P	PRR26	0.747738	3.49e-89	postive
HOXA11-AS	HOXA11-AS	1	0	postive
CD160	AC096642.2	0.740901	9.44e-87	postive
SEMA6A-AS1	AC096642.2	0.822408	4.05e-122	postive
PRDX6-AS1	AC096642.2	0.719269	1.55e-79	postive
AQP4-AS1	AL589743.3	0.72047	6.41e-80	postive
ADRA1A	AL161457.1	0.759825	1.11e-93	postive
MROH7	AL161457.1	0.708341	3.81e-76	postive
CD160	WAKMAR2	0.724019	4.62e-81	postive
CD160	AC008453.2	0.750433	3.65e-90	postive
RORA-AS1	AC008453.2	0.710607	7.77e-77	postive
MROH7	AC008453.2	0.789613	5.3e-106	postive
ADAMTSL4-AS2	AC008453.2	0.729116	9.82e-83	postive
SEMA6A-AS1	AC008453.2	0.768271	5.5e-97	postive
RMST	LINC00308	0.77952	1.3e-101	postive
AQP4-AS1	LINC00308	0.92531	1.74e-208	postive
CD160	AL450344.3	0.849523	3.44e-138	postive
RORA-AS1	AL450344.3	0.871427	1.1e-153	postive
ARLNC1	AL450344.3	0.765804	5.25e-96	postive
MROH7	AL450344.3	0.837182	1.65e-130	postive
ADAMTSL4-AS2	AL450344.3	0.830812	8.61e-127	postive
SEMA6A-AS1	AL450344.3	0.84545	1.4e-135	postive
PRDX6-AS1	AL450344.3	0.721184	3.79e-80	postive
ZNF788P	AL450344.3	0.767393	1.23e-96	postive
LINC00595	LINC00595	1	0	postive
SEMA6A-AS1	AC008269.1	0.763012	6.52e-95	postive
ZNF788P	AC008269.1	0.703883	8.31e-75	postive
SDK1	SDK1-AS1	0.865808	1.88e-149	postive
CD160	AP000692.1	0.815781	1.32e-118	postive
RORA-AS1	AP000692.1	0.862109	9.08e-147	postive
ARLNC1	AP000692.1	0.721443	3.13e-80	postive
MROH7	AP000692.1	0.790065	3.33e-106	postive
ADAMTSL4-AS2	AP000692.1	0.838875	1.6e-131	postive
SEMA6A-AS1	AP000692.1	0.807196	2.95e-114	postive
PRDX6-AS1	AP000692.1	0.71737	6.17e-79	postive
ZNF788P	AP000692.1	0.777632	8.12e-101	postive
CD160	AC007849.1	0.862432	5.33e-147	postive
RORA-AS1	AC007849.1	0.951648	2.55e-253	postive
ARLNC1	AC007849.1	0.761518	2.47e-94	postive
MROH7	AC007849.1	0.831704	2.65e-127	postive
ADAMTSL4-AS2	AC007849.1	0.83977	4.59e-132	postive
SEMA6A-AS1	AC007849.1	0.808688	5.36e-115	postive
ZNF788P	AC007849.1	0.777798	6.91e-101	postive
RMST	AP002907.1	0.703162	1.36e-74	postive
CD160	RERG-IT1	0.836431	4.62e-130	postive
RORA-AS1	RERG-IT1	0.786762	9.74e-105	postive
MROH7	RERG-IT1	0.750926	2.41e-90	postive
ADAMTSL4-AS2	RERG-IT1	0.704208	6.65e-75	postive
SEMA6A-AS1	RERG-IT1	0.766116	3.95e-96	postive
POTEKP	AC018865.2	0.815987	1.04e-118	postive
FAR2P1	AC018865.2	0.960283	8.74e-274	postive
CD160	LINC00316	0.72929	8.59e-83	postive
RORA-AS1	LINC00316	0.734309	1.77e-84	postive
MROH7	LINC00316	0.774817	1.2e-99	postive
ADAMTSL4-AS2	LINC00316	0.705579	2.59e-75	postive
CD160	AL445931.1	0.773343	4.87e-99	postive
LINC02614	AL445931.1	0.709663	1.51e-76	postive
SEMA6A-AS1	AL445931.1	0.855185	6e-142	postive
PRDX6-AS1	AL445931.1	0.751686	1.26e-90	postive
ZNF788P	AL445931.1	0.709729	1.44e-76	postive
ITGB6	AC133530.1	0.727539	3.26e-82	postive
CD160	EIPR1-IT1	0.707347	7.61e-76	postive
RORA-AS1	EIPR1-IT1	0.781723	1.5e-102	postive
UCA1	AL158835.2	0.718339	3.05e-79	postive
ADRA1A	JAZF1-AS1	0.72181	2.39e-80	postive
TSLP	JAZF1-AS1	0.713401	1.07e-77	postive
UBXN10	JAZF1-AS1	0.701238	5.03e-74	postive
STAC	JAZF1-AS1	0.78208	1.05e-102	postive
ACTA2	JAZF1-AS1	0.722487	1.44e-80	postive
CD160	AC022272.1	0.894984	6.69e-174	postive
HERC3	AC022272.1	0.746177	1.27e-88	postive
RORA-AS1	AC022272.1	0.91146	3.81e-191	postive
ARLNC1	AC022272.1	0.718361	3e-79	postive
MROH7	AC022272.1	0.74836	2.08e-89	postive
ADAMTSL4-AS2	AC022272.1	0.782583	6.41e-103	postive
SEMA6A-AS1	AC022272.1	0.819581	1.33e-120	postive
PRDX6-AS1	AC022272.1	0.717536	5.47e-79	postive
ZNF788P	AC022272.1	0.755501	4.83e-92	postive
APLF	AC022272.1	0.711399	4.44e-77	postive
SEMA6A-AS1	FLNC-AS1	0.764555	1.63e-95	postive
ROR2	CERNA2	0.70907	2.29e-76	postive
CDHR1	CERNA2	0.764429	1.82e-95	postive
APOBEC3C	CERNA2	0.802558	5.34e-112	postive
ST6GALNAC2	CERNA2	0.73419	1.94e-84	postive
SNAI2	CERNA2	0.712583	1.92e-77	postive
CD160	AL450992.2	0.814574	5.58e-118	postive
RORA-AS1	AL450992.2	0.757083	1.22e-92	postive
ARLNC1	AL450992.2	0.760794	4.71e-94	postive
MROH7	AL450992.2	0.736696	2.71e-85	postive
ADAMTSL4-AS2	AL450992.2	0.712522	2e-77	postive
SEMA6A-AS1	AL450992.2	0.880223	9.88e-161	postive
PRDX6-AS1	AL450992.2	0.753306	3.19e-91	postive
ZNF788P	AL450992.2	0.762863	7.45e-95	postive
SLC26A3	AC051619.10	0.713607	9.26e-78	postive
RMST	AC004485.1	0.809556	1.98e-115	postive
AQP4-AS1	AC004485.1	0.938107	8.78e-228	postive
CYP11A1	FRMD6-AS2	0.709814	1.36e-76	postive
PLAC9	FRMD6-AS2	0.736913	2.28e-85	postive
TSLP	FRMD6-AS2	0.742799	2.03e-87	postive
ARHGEF6	LINC00987	0.705421	2.89e-75	postive
CD160	AC005856.1	0.838734	1.94e-131	postive
RORA-AS1	AC005856.1	0.772944	7.09e-99	postive
ARLNC1	AC005856.1	0.747928	2.98e-89	postive
MROH7	AC005856.1	0.745214	2.82e-88	postive
SEMA6A-AS1	AC005856.1	0.879594	3.28e-160	postive
PRDX6-AS1	AC005856.1	0.742182	3.35e-87	postive
ZNF788P	AC005856.1	0.741302	6.83e-87	postive
PIPOX	PGM5-AS1	0.734674	1.33e-84	postive
PLIN4	PGM5-AS1	0.709191	2.1e-76	postive
LINC01778	PGM5-AS1	0.701269	4.93e-74	postive
ACTG2	PGM5-AS1	0.728754	1.29e-82	postive
MROH7	AC005674.1	0.736751	2.6e-85	postive
SEMA6A-AS1	AC107081.3	0.756024	3.07e-92	postive
SEMA6A-AS1	AP001469.2	0.742413	2.78e-87	postive
FAM66C	FAM66C	1	0	postive
CD160	AC005304.1	0.758452	3.71e-93	postive
ARLNC1	AC005304.1	0.719081	1.77e-79	postive
MROH7	AC005304.1	0.754601	1.05e-91	postive
SEMA6A-AS1	AC005304.1	0.828221	2.53e-125	postive
ZNF788P	AC005304.1	0.708631	3.11e-76	postive
RORA-AS1	AC024084.1	0.700349	9.18e-74	postive
ST6GALNAC2	LINC02541	0.725858	1.16e-81	postive
CD160	AC127526.2	0.743711	9.65e-88	postive
RORA-AS1	AC127526.2	0.735875	5.18e-85	postive
MROH7	AC127526.2	0.737079	2e-85	postive
ADAMTSL4-AS2	AC127526.2	0.736699	2.7e-85	postive
SEMA6A-AS1	AC127526.2	0.740239	1.61e-86	postive
PLAC9	LINC01082	0.71511	3.15e-78	postive
TSLP	LINC01082	0.703559	1.04e-74	postive
C16orf89	LINC01082	0.725604	1.41e-81	postive
CD160	AC083806.2	0.810066	1.1e-115	postive
HERC3	AC083806.2	0.733281	3.95e-84	postive
RORA-AS1	AC083806.2	0.743467	1.18e-87	postive
ARLNC1	AC083806.2	0.770476	7.15e-98	postive
SEMA6A-AS1	AC083806.2	0.84165	3.26e-133	postive
PRDX6-AS1	AC083806.2	0.740533	1.27e-86	postive
ZNF788P	AC083806.2	0.734845	1.16e-84	postive
CD160	AL590666.5	0.870137	1.07e-152	postive
RORA-AS1	AL590666.5	0.910533	4.33e-190	postive
ARLNC1	AL590666.5	0.788439	1.77e-105	postive
MROH7	AL590666.5	0.8119	1.3e-116	postive
ADAMTSL4-AS2	AL590666.5	0.813641	1.68e-117	postive
SEMA6A-AS1	AL590666.5	0.861774	1.58e-146	postive
PRDX6-AS1	AL590666.5	0.734617	1.39e-84	postive
ZNF788P	AL590666.5	0.789141	8.61e-106	postive
AOX1	FHAD1-AS1	0.718982	1.91e-79	postive
FHAD1-AS1	FHAD1-AS1	1	0	postive
SLC39A2	FHAD1-AS1	0.766038	4.24e-96	postive
APOBEC3C	FHAD1-AS1	0.701005	5.9e-74	postive
CD160	AL357078.2	0.875452	7.63e-157	postive
HERC3	AL357078.2	0.701713	3.65e-74	postive
RORA-AS1	AL357078.2	0.950423	1.01e-250	postive
ARLNC1	AL357078.2	0.744703	4.29e-88	postive
MROH7	AL357078.2	0.817021	2.99e-119	postive
ADAMTSL4-AS2	AL357078.2	0.815032	3.24e-118	postive
SEMA6A-AS1	AL357078.2	0.822563	3.34e-122	postive
ZNF788P	AL357078.2	0.770203	9.21e-98	postive
RFPL1S	RFPL1S	1	0	postive
SEMA6A-AS1	TPM1-AS	0.731106	2.13e-83	postive
SEMA6A-AS1	MUC20-OT1	0.71067	7.43e-77	postive
CD160	ZNF451-AS1	0.826313	2.94e-124	postive
LINC02614	ZNF451-AS1	0.711491	4.16e-77	postive
C6orf163	ZNF451-AS1	0.716561	1.11e-78	postive
RORA-AS1	ZNF451-AS1	0.799706	1.22e-110	postive
ARLNC1	ZNF451-AS1	0.775865	4.43e-100	postive
MROH7	ZNF451-AS1	0.762482	1.05e-94	postive
ADAMTSL4-AS2	ZNF451-AS1	0.735691	5.99e-85	postive
SEMA6A-AS1	ZNF451-AS1	0.90866	5.48e-188	postive
PRDX6-AS1	ZNF451-AS1	0.801967	1.02e-111	postive
ZNF788P	ZNF451-AS1	0.801418	1.88e-111	postive
CCDC180	AL109615.4	0.725263	1.82e-81	postive
AKR1C1	AL032819.1	0.790038	3.42e-106	postive
AKR1C2	AL032819.1	0.834538	6.03e-129	postive
CD160	AF235103.1	0.815255	2.48e-118	postive
RORA-AS1	AF235103.1	0.862219	7.58e-147	postive
ARLNC1	AF235103.1	0.701485	4.26e-74	postive
ADAMTSL4-AS2	AF235103.1	0.738534	6.3e-86	postive
SEMA6A-AS1	AF235103.1	0.777331	1.09e-100	postive
ZNF788P	AF235103.1	0.742287	3.08e-87	postive
ARHGAP20	AC124854.1	0.712568	1.94e-77	postive
SYNE1	AC124854.1	0.710538	8.16e-77	postive
CD160	AL592301.1	0.802933	3.52e-112	postive
RORA-AS1	AL592301.1	0.725772	1.24e-81	postive
ARLNC1	AL592301.1	0.71047	8.56e-77	postive
MROH7	AL592301.1	0.706936	1.01e-75	postive
SEMA6A-AS1	AL592301.1	0.853408	9.44e-141	postive
PRDX6-AS1	AL592301.1	0.710114	1.1e-76	postive
CD160	AL390071.1	0.82812	2.88e-125	postive
HERC3	AL390071.1	0.753977	1.79e-91	postive
RORA-AS1	AL390071.1	0.869035	7.36e-152	postive
RMST	AL390071.1	0.743733	9.48e-88	postive
SEMA6A-AS1	AL390071.1	0.77784	6.64e-101	postive
CD160	KIF5C-AS1	0.853163	1.38e-140	postive
RORA-AS1	KIF5C-AS1	0.983537	0	postive
ARLNC1	KIF5C-AS1	0.739708	2.46e-86	postive
MROH7	KIF5C-AS1	0.781809	1.38e-102	postive
ADAMTSL4-AS2	KIF5C-AS1	0.8384	3.08e-131	postive
SEMA6A-AS1	KIF5C-AS1	0.772185	1.45e-98	postive
ZNF788P	KIF5C-AS1	0.769478	1.8e-97	postive
CD160	AC021231.1	0.841332	5.11e-133	postive
HERC3	AC021231.1	0.734179	1.96e-84	postive
RORA-AS1	AC021231.1	0.809998	1.19e-115	postive
RMST	AC021231.1	0.70991	1.27e-76	postive
ARLNC1	AC021231.1	0.718374	2.97e-79	postive
SEMA6A-AS1	AC021231.1	0.850757	5.38e-139	postive
PRDX6-AS1	AC021231.1	0.713943	7.28e-78	postive
ZNF788P	AC021231.1	0.717189	7.03e-79	postive
CD160	Z99289.1	0.847862	4.08e-137	postive
RORA-AS1	Z99289.1	0.944522	4.47e-239	postive
ARLNC1	Z99289.1	0.756293	2.43e-92	postive
MROH7	Z99289.1	0.841342	5.04e-133	postive
ADAMTSL4-AS2	Z99289.1	0.876933	4.94e-158	postive
SEMA6A-AS1	Z99289.1	0.790199	2.9e-106	postive
ZNF788P	Z99289.1	0.776731	1.93e-100	postive
BHLHE40-AS1	BHLHE40-AS1	1	0	postive
CCDC180	AC008735.4	0.739756	2.37e-86	postive
P3H2	P3H2-AS1	0.867756	6.74e-151	postive
CD160	AC131182.1	0.788886	1.12e-105	postive
HERC3	AC131182.1	0.769839	1.29e-97	postive
RORA-AS1	AC131182.1	0.809147	3.17e-115	postive
RMST	AC131182.1	0.812954	3.79e-117	postive
SEMA6A-AS1	AC131182.1	0.748201	2.37e-89	postive
AQP4-AS1	AC131182.1	0.755504	4.82e-92	postive
LINC00844	LINC00844	1	0	postive
CD160	AC007285.1	0.754717	9.49e-92	postive
HERC3	AC007285.1	0.727937	2.41e-82	postive
RORA-AS1	AC007285.1	0.753498	2.7e-91	postive
SEMA6A-AS1	AC007285.1	0.742711	2.18e-87	postive
CD160	MAMDC2-AS1	0.874925	2e-156	postive
C6orf163	MAMDC2-AS1	0.708631	3.11e-76	postive
RORA-AS1	MAMDC2-AS1	0.866943	2.72e-150	postive
ARLNC1	MAMDC2-AS1	0.764107	2.44e-95	postive
MROH7	MAMDC2-AS1	0.860457	1.35e-145	postive
ADAMTSL4-AS2	MAMDC2-AS1	0.801993	9.96e-112	postive
SEMA6A-AS1	MAMDC2-AS1	0.872883	8.14e-155	postive
PRDX6-AS1	MAMDC2-AS1	0.749808	6.17e-90	postive
ZNF788P	MAMDC2-AS1	0.784163	1.33e-103	postive
CD160	NPTN-IT1	0.901975	7.66e-181	postive
RORA-AS1	NPTN-IT1	0.841886	2.33e-133	postive
ARLNC1	NPTN-IT1	0.770782	5.37e-98	postive
MROH7	NPTN-IT1	0.824788	2.04e-123	postive
ADAMTSL4-AS2	NPTN-IT1	0.803523	1.83e-112	postive
SEMA6A-AS1	NPTN-IT1	0.90457	1.49e-183	postive
PRDX6-AS1	NPTN-IT1	0.779268	1.66e-101	postive
ZNF788P	NPTN-IT1	0.807403	2.33e-114	postive
APLF	NPTN-IT1	0.703763	9.02e-75	postive
CD160	AC099343.2	0.737458	1.48e-85	postive
RMST	AC099343.2	0.756155	2.74e-92	postive
SEMA6A-AS1	AC099343.2	0.739217	3.65e-86	postive
RORA-AS1	AC009269.5	0.737882	1.06e-85	postive
MROH7	AC009269.5	0.741203	7.4e-87	postive
SEMA6A-AS1	AC009269.5	0.74911	1.11e-89	postive
CD160	AC025287.3	0.738066	9.14e-86	postive
SEMA6A-AS1	AC025287.3	0.81384	1.33e-117	postive
CD160	LINC00852	0.752513	6.26e-91	postive
RORA-AS1	LINC00852	0.846524	2.92e-136	postive
MROH7	LINC00852	0.707709	5.92e-76	postive
ADAMTSL4-AS2	LINC00852	0.788849	1.16e-105	postive
RNF165	PICART1	0.703132	1.39e-74	postive
MCM8-AS1	MCM8-AS1	1	0	postive
RORA-AS1	AC090907.3	0.714961	3.51e-78	postive
ADAMTSL4-AS2	AC090907.3	0.702434	2.23e-74	postive
SEMA6A-AS1	AC090907.3	0.708127	4.42e-76	postive
ZNF788P	AC090907.3	0.71687	8.86e-79	postive
CD160	AC087276.1	0.70383	8.62e-75	postive
SEMA6A-AS1	AC087276.1	0.780262	6.29e-102	postive
RORA-AS1	STX17-AS1	0.795861	7.65e-109	postive
CD160	RNF216-IT1	0.850801	5.04e-139	postive
RORA-AS1	RNF216-IT1	0.81705	2.89e-119	postive
ARLNC1	RNF216-IT1	0.757343	9.77e-93	postive
MROH7	RNF216-IT1	0.789479	6.08e-106	postive
ADAMTSL4-AS2	RNF216-IT1	0.745423	2.37e-88	postive
SEMA6A-AS1	RNF216-IT1	0.869168	5.84e-152	postive
PRDX6-AS1	RNF216-IT1	0.735029	1.01e-84	postive
ZNF788P	RNF216-IT1	0.755572	4.54e-92	postive
CD160	AC107896.1	0.710308	9.59e-77	postive
HERC3	AC107896.1	0.747467	4.37e-89	postive
RORA-AS1	AC107896.1	0.805708	1.59e-113	postive
RMST	AC107896.1	0.833075	4.29e-128	postive
AQP4-AS1	AC107896.1	0.829553	4.48e-126	postive
HERC3	AP000462.2	0.735237	8.56e-85	postive
RMST	AP000462.2	0.86761	8.67e-151	postive
AQP4-AS1	AP000462.2	0.863312	1.24e-147	postive
DGCR5	DGCR5	1	0	postive
NIPSNAP3B	AC024361.2	0.780812	3.67e-102	postive
CD160	AC004637.1	0.71609	1.56e-78	postive
MROH7	AC004637.1	0.770613	6.29e-98	postive
SEMA6A-AS1	AC004637.1	0.755514	4.78e-92	postive
HERC3	AC100774.1	0.755596	4.45e-92	postive
RMST	AC100774.1	0.871206	1.62e-153	postive
AQP4-AS1	AC100774.1	0.913937	4.98e-194	postive
CD160	AC002128.2	0.8122	9.17e-117	postive
RORA-AS1	AC002128.2	0.779837	9.54e-102	postive
ARLNC1	AC002128.2	0.722207	1.78e-80	postive
MROH7	AC002128.2	0.707029	9.49e-76	postive
ADAMTSL4-AS2	AC002128.2	0.78699	7.73e-105	postive
SEMA6A-AS1	AC002128.2	0.838745	1.91e-131	postive
PRDX6-AS1	AC002128.2	0.706271	1.61e-75	postive
ZNF788P	AC002128.2	0.736044	4.54e-85	postive
CD160	AL162386.2	0.73214	9.58e-84	postive
RORA-AS1	AL162386.2	0.856614	6.38e-143	postive
ADAMTSL4-AS2	AL162386.2	0.721214	3.7e-80	postive
CD160	AL121672.1	0.730679	2.96e-83	postive
HERC3	AL121672.1	0.792674	2.21e-107	postive
RORA-AS1	AL121672.1	0.709177	2.12e-76	postive
RMST	AL121672.1	0.80437	7.11e-113	postive
SEMA6A-AS1	AL121672.1	0.736681	2.74e-85	postive
AQP4-AS1	AL121672.1	0.789865	4.09e-106	postive
CD160	AC004771.4	0.700702	7.24e-74	postive
ARLNC1	AC004771.4	0.711219	5.05e-77	postive
SEMA6A-AS1	AC004771.4	0.767567	1.05e-96	postive
CD160	AC091544.2	0.704976	3.92e-75	postive
HERC3	AC091544.2	0.730547	3.28e-83	postive
RMST	AC091544.2	0.790161	3.01e-106	postive
AQP4-AS1	AC091544.2	0.772766	8.39e-99	postive
MROH7	LAMA4-AS1	0.720383	6.83e-80	postive
RMST	AC104365.2	0.836183	6.48e-130	postive
AQP4-AS1	AC104365.2	0.920392	5.72e-202	postive
CMYA5	PRECSIT	0.790278	2.67e-106	postive
SYNPO2L	PRECSIT	0.754064	1.66e-91	postive
KY	PRECSIT	0.71928	1.53e-79	postive
NEB	PRECSIT	0.751188	1.93e-90	postive
FNDC5	PRECSIT	0.713753	8.34e-78	postive
EXTL1	PRECSIT	0.746994	6.47e-89	postive
SYNPO	PRECSIT	0.725136	2e-81	postive
GAD1	AC007405.2	0.800278	6.53e-111	postive
CD160	ASAP1-IT2	0.868326	2.52e-151	postive
RORA-AS1	ASAP1-IT2	0.859412	7.35e-145	postive
ARLNC1	ASAP1-IT2	0.743602	1.05e-87	postive
MROH7	ASAP1-IT2	0.780354	5.76e-102	postive
ADAMTSL4-AS2	ASAP1-IT2	0.746396	1.06e-88	postive
SEMA6A-AS1	ASAP1-IT2	0.858084	6.19e-144	postive
PRDX6-AS1	ASAP1-IT2	0.721697	2.59e-80	postive
ZNF788P	ASAP1-IT2	0.74338	1.26e-87	postive
CD160	AP001775.2	0.740735	1.08e-86	postive
ARLNC1	AP001775.2	0.724413	3.44e-81	postive
SEMA6A-AS1	AP001775.2	0.828287	2.32e-125	postive
CD160	AL035404.2	0.796474	3.98e-109	postive
RORA-AS1	AL035404.2	0.755398	5.28e-92	postive
ARLNC1	AL035404.2	0.722568	1.36e-80	postive
MROH7	AL035404.2	0.744095	7.05e-88	postive
ADAMTSL4-AS2	AL035404.2	0.712974	1.45e-77	postive
SEMA6A-AS1	AL035404.2	0.827755	4.61e-125	postive
PRDX6-AS1	AL035404.2	0.702572	2.03e-74	postive
ZNF788P	AL035404.2	0.735342	7.88e-85	postive
CD160	AP003783.1	0.846677	2.33e-136	postive
HERC3	AP003783.1	0.728905	1.15e-82	postive
RORA-AS1	AP003783.1	0.808502	6.64e-115	postive
ARLNC1	AP003783.1	0.734249	1.86e-84	postive
MROH7	AP003783.1	0.710268	9.87e-77	postive
SEMA6A-AS1	AP003783.1	0.869455	3.54e-152	postive
PRDX6-AS1	AP003783.1	0.729073	1.01e-82	postive
ZNF788P	AP003783.1	0.729722	6.17e-83	postive
DGKK	AC138123.2	0.78305	4.03e-103	postive
SLC6A19	AC138123.2	0.799126	2.29e-110	postive
ETV5	AC138123.2	0.735605	6.41e-85	postive
KCNMA1	GAS6-DT	0.723007	9.81e-81	postive
GSDME	GAS6-DT	0.736098	4.35e-85	postive
SPEG	GAS6-DT	0.704447	5.64e-75	postive
MYLK	GAS6-DT	0.704908	4.11e-75	postive
SLC24A3	GAS6-DT	0.727906	2.47e-82	postive
ITGA1	GAS6-DT	0.73318	4.27e-84	postive
BMERB1	GAS6-DT	0.757982	5.59e-93	postive
ACTA2	GAS6-DT	0.79204	4.29e-107	postive
SYNPO	GAS6-DT	0.705259	3.23e-75	postive
CD160	AP001007.1	0.821784	8.81e-122	postive
RORA-AS1	AP001007.1	0.946883	1.41e-243	postive
ARLNC1	AP001007.1	0.743075	1.62e-87	postive
MROH7	AP001007.1	0.773145	5.87e-99	postive
ADAMTSL4-AS2	AP001007.1	0.816667	4.58e-119	postive
SEMA6A-AS1	AP001007.1	0.777426	9.9e-101	postive
ZNF788P	AP001007.1	0.75833	4.13e-93	postive
SHISAL1	AC036108.3	0.764072	2.51e-95	postive
ARHGAP20	AC036108.3	0.730138	4.49e-83	postive
MYLK	AC036108.3	0.750158	4.6e-90	postive
PIPOX	AC036108.3	0.754266	1.4e-91	postive
CD160	Z97832.2	0.716627	1.06e-78	postive
C6orf163	Z97832.2	0.733913	2.41e-84	postive
MROH7	Z97832.2	0.714657	4.36e-78	postive
SEMA6A-AS1	Z97832.2	0.785902	2.32e-104	postive
PRDX6-AS1	Z97832.2	0.752893	4.53e-91	postive
ZNF788P	Z97832.2	0.732456	7.5e-84	postive
CD160	AC068790.4	0.868512	1.83e-151	postive
HERC3	AC068790.4	0.750981	2.3e-90	postive
RORA-AS1	AC068790.4	0.874741	2.81e-156	postive
ARLNC1	AC068790.4	0.734401	1.65e-84	postive
MROH7	AC068790.4	0.74133	6.68e-87	postive
ADAMTSL4-AS2	AC068790.4	0.736527	3.1e-85	postive
SEMA6A-AS1	AC068790.4	0.854193	2.81e-141	postive
PRDX6-AS1	AC068790.4	0.726507	7.12e-82	postive
ZNF788P	AC068790.4	0.760762	4.84e-94	postive
CD160	SYNJ2-IT1	0.773175	5.7e-99	postive
RORA-AS1	SYNJ2-IT1	0.814488	6.18e-118	postive
ADAMTSL4-AS2	SYNJ2-IT1	0.704848	4.28e-75	postive
SEMA6A-AS1	SYNJ2-IT1	0.795616	9.93e-109	postive
ZNF788P	SYNJ2-IT1	0.72378	5.52e-81	postive
CD160	AC107982.2	0.722381	1.56e-80	postive
SEMA6A-AS1	AC107982.2	0.765064	1.03e-95	postive
CD160	AC124069.1	0.869812	1.89e-152	postive
HERC3	AC124069.1	0.733411	3.57e-84	postive
RORA-AS1	AC124069.1	0.959762	1.99e-272	postive
ARLNC1	AC124069.1	0.732529	7.09e-84	postive
MROH7	AC124069.1	0.760677	5.22e-94	postive
ADAMTSL4-AS2	AC124069.1	0.789799	4.38e-106	postive
SEMA6A-AS1	AC124069.1	0.798859	3.06e-110	postive
ZNF788P	AC124069.1	0.754817	8.71e-92	postive
RORA-AS1	AC005740.3	0.723991	4.72e-81	postive
SEMA6A-AS1	AF230666.2	0.744044	7.35e-88	postive
CD160	AL360178.1	0.886442	4.68e-166	postive
RORA-AS1	AL360178.1	0.884128	4.86e-164	postive
ARLNC1	AL360178.1	0.716618	1.06e-78	postive
MROH7	AL360178.1	0.787221	6.11e-105	postive
ADAMTSL4-AS2	AL360178.1	0.780223	6.54e-102	postive
SEMA6A-AS1	AL360178.1	0.827092	1.08e-124	postive
PRDX6-AS1	AL360178.1	0.708955	2.48e-76	postive
ZNF788P	AL360178.1	0.762844	7.57e-95	postive
APLF	AL360178.1	0.728077	2.17e-82	postive
CD160	AC017116.2	0.836088	7.37e-130	postive
RORA-AS1	AC017116.2	0.8124	7.25e-117	postive
ARLNC1	AC017116.2	0.754543	1.1e-91	postive
MROH7	AC017116.2	0.817006	3.04e-119	postive
ADAMTSL4-AS2	AC017116.2	0.777325	1.09e-100	postive
SEMA6A-AS1	AC017116.2	0.871972	4.15e-154	postive
PRDX6-AS1	AC017116.2	0.74245	2.7e-87	postive
ZNF788P	AC017116.2	0.768909	3.05e-97	postive
CD160	AC007216.2	0.769633	1.56e-97	postive
RORA-AS1	AC007216.2	0.865111	6.11e-149	postive
MROH7	AC007216.2	0.747222	5.36e-89	postive
ADAMTSL4-AS2	AC007216.2	0.836731	3.06e-130	postive
SEMA6A-AS1	AC007216.2	0.742927	1.83e-87	postive
ZNF788P	AC007216.2	0.733411	3.57e-84	postive
CD160	AL031666.3	0.863071	1.85e-147	postive
HERC3	AL031666.3	0.761518	2.47e-94	postive
RORA-AS1	AL031666.3	0.870115	1.11e-152	postive
ARLNC1	AL031666.3	0.73362	3.03e-84	postive
MROH7	AL031666.3	0.700048	1.13e-73	postive
ADAMTSL4-AS2	AL031666.3	0.715079	3.22e-78	postive
SEMA6A-AS1	AL031666.3	0.850519	7.71e-139	postive
PRDX6-AS1	AL031666.3	0.723448	7.07e-81	postive
ZNF788P	AL031666.3	0.746512	9.65e-89	postive
ADRA1A	AF165147.1	0.755247	6.01e-92	postive
STAC	AF165147.1	0.731981	1.08e-83	postive
CD160	AC009244.1	0.900833	1.13e-179	postive
RORA-AS1	AC009244.1	0.888086	1.62e-167	postive
ARLNC1	AC009244.1	0.757501	8.51e-93	postive
MROH7	AC009244.1	0.800062	8.28e-111	postive
ADAMTSL4-AS2	AC009244.1	0.794069	5.11e-108	postive
SEMA6A-AS1	AC009244.1	0.875475	7.32e-157	postive
PRDX6-AS1	AC009244.1	0.737489	1.45e-85	postive
ZNF788P	AC009244.1	0.773449	4.4e-99	postive
APLF	AC009244.1	0.704315	6.18e-75	postive
GOLGA6L9	PSMA3-AS1	0.755404	5.25e-92	postive
ZMAT1	PSMA3-AS1	0.718148	3.5e-79	postive
MROH7	AC121154.1	0.766814	2.09e-96	postive
CD160	AC005538.3	0.791416	8.22e-107	postive
HERC3	AC005538.3	0.794667	2.72e-108	postive
RORA-AS1	AC005538.3	0.808105	1.04e-114	postive
RMST	AC005538.3	0.790993	1.27e-106	postive
SEMA6A-AS1	AC005538.3	0.778459	3.65e-101	postive
AQP4-AS1	AC005538.3	0.729048	1.03e-82	postive
ARHGAP20	AC040168.1	0.705434	2.86e-75	postive
SYNE1	AC040168.1	0.702822	1.72e-74	postive
CD160	ASH1L-IT1	0.87372	1.8e-155	postive
HERC3	ASH1L-IT1	0.766715	2.29e-96	postive
RORA-AS1	ASH1L-IT1	0.898013	7.58e-177	postive
ARLNC1	ASH1L-IT1	0.734871	1.14e-84	postive
MROH7	ASH1L-IT1	0.722837	1.11e-80	postive
ADAMTSL4-AS2	ASH1L-IT1	0.747329	4.9e-89	postive
SEMA6A-AS1	ASH1L-IT1	0.824474	3.04e-123	postive
PRDX6-AS1	ASH1L-IT1	0.70932	1.92e-76	postive
ZNF788P	ASH1L-IT1	0.748426	1.97e-89	postive
CUBN	N4BP2L2-IT2	0.726903	5.28e-82	postive
CD160	N4BP2L2-IT2	0.829704	3.68e-126	postive
C6orf163	N4BP2L2-IT2	0.755328	5.61e-92	postive
RORA-AS1	N4BP2L2-IT2	0.782012	1.13e-102	postive
MROH7	N4BP2L2-IT2	0.801397	1.92e-111	postive
ADAMTSL4-AS2	N4BP2L2-IT2	0.716371	1.27e-78	postive
SEMA6A-AS1	N4BP2L2-IT2	0.823633	8.76e-123	postive
PRDX6-AS1	N4BP2L2-IT2	0.720222	7.69e-80	postive
ZNF788P	N4BP2L2-IT2	0.747233	5.31e-89	postive
CD160	XXYLT1-AS1	0.825681	6.57e-124	postive
RORA-AS1	XXYLT1-AS1	0.800184	7.24e-111	postive
MROH7	XXYLT1-AS1	0.804913	3.87e-113	postive
ADAMTSL4-AS2	XXYLT1-AS1	0.757113	1.19e-92	postive
SEMA6A-AS1	XXYLT1-AS1	0.796978	2.32e-109	postive
SEMA6A-AS1	AC008750.4	0.747106	5.9e-89	postive
CD160	ZNF630-AS1	0.81414	9.34e-118	postive
RORA-AS1	ZNF630-AS1	0.74395	7.94e-88	postive
ARLNC1	ZNF630-AS1	0.751323	1.72e-90	postive
MROH7	ZNF630-AS1	0.744014	7.53e-88	postive
SEMA6A-AS1	ZNF630-AS1	0.867536	9.83e-151	postive
PRDX6-AS1	ZNF630-AS1	0.749737	6.55e-90	postive
ZNF788P	ZNF630-AS1	0.743831	8.75e-88	postive
MROH7	AC104237.3	0.702453	2.21e-74	postive
CD160	AL450384.1	0.815436	2e-118	postive
RORA-AS1	AL450384.1	0.744343	5.75e-88	postive
ARLNC1	AL450384.1	0.718386	2.95e-79	postive
MROH7	AL450384.1	0.723172	8.68e-81	postive
SEMA6A-AS1	AL450384.1	0.888874	3.18e-168	postive
PRDX6-AS1	AL450384.1	0.775322	7.44e-100	postive
ZNF788P	AL450384.1	0.768739	3.57e-97	postive
CD160	AC012409.1	0.868034	4.17e-151	postive
RORA-AS1	AC012409.1	0.898297	3.97e-177	postive
ARLNC1	AC012409.1	0.782315	8.35e-103	postive
MROH7	AC012409.1	0.823164	1.58e-122	postive
ADAMTSL4-AS2	AC012409.1	0.804265	8e-113	postive
SEMA6A-AS1	AC012409.1	0.861278	3.55e-146	postive
PRDX6-AS1	AC012409.1	0.734896	1.12e-84	postive
ZNF788P	AC012409.1	0.782613	6.22e-103	postive
CD160	SHANK2-AS2	0.798255	5.88e-110	postive
RORA-AS1	SHANK2-AS2	0.710523	8.25e-77	postive
ARLNC1	SHANK2-AS2	0.70823	4.11e-76	postive
SEMA6A-AS1	SHANK2-AS2	0.852747	2.61e-140	postive
PRDX6-AS1	SHANK2-AS2	0.711297	4.78e-77	postive
CD160	PABPC4-AS1	0.851679	1.33e-139	postive
RORA-AS1	PABPC4-AS1	0.83693	2.33e-130	postive
ARLNC1	PABPC4-AS1	0.758236	4.48e-93	postive
MROH7	PABPC4-AS1	0.732659	6.41e-84	postive
ADAMTSL4-AS2	PABPC4-AS1	0.804517	6.04e-113	postive
SEMA6A-AS1	PABPC4-AS1	0.865802	1.9e-149	postive
PRDX6-AS1	PABPC4-AS1	0.735432	7.34e-85	postive
ZNF788P	PABPC4-AS1	0.771937	1.83e-98	postive
TTLL9	UCKL1-AS1	0.706456	1.41e-75	postive
FHAD1-AS1	AC021683.1	0.72002	8.92e-80	postive
SLC39A2	AC021683.1	0.773596	3.83e-99	postive
CD160	AC107398.2	0.800675	4.23e-111	postive
RORA-AS1	AC107398.2	0.759471	1.51e-93	postive
MROH7	AC107398.2	0.751529	1.44e-90	postive
ADAMTSL4-AS2	AC107398.2	0.714491	4.92e-78	postive
SEMA6A-AS1	AC107398.2	0.808952	3.96e-115	postive
ZNF788P	AC107398.2	0.71436	5.4e-78	postive
RORA-AS1	AC006581.2	0.810564	6.17e-116	postive
RORA-AS1	AL035706.1	0.779048	2.06e-101	postive
MROH7	AL035706.1	0.703454	1.11e-74	postive
CD160	EDRF1-AS1	0.789511	5.89e-106	postive
HERC3	EDRF1-AS1	0.778979	2.2e-101	postive
RORA-AS1	EDRF1-AS1	0.727291	3.93e-82	postive
RMST	EDRF1-AS1	0.773169	5.73e-99	postive
SEMA6A-AS1	EDRF1-AS1	0.799088	2.39e-110	postive
AQP4-AS1	EDRF1-AS1	0.746927	6.84e-89	postive
RORA-AS1	AL139330.1	0.71268	1.79e-77	postive
SEMA6A-AS1	AL139330.1	0.762792	7.94e-95	postive
EDNRA	AL356495.1	0.738315	7.5e-86	postive
ARHGAP20	AL356495.1	0.727791	2.69e-82	postive
CACNA1C	AL356495.1	0.712761	1.69e-77	postive
SYNE1	AL356495.1	0.700815	6.7e-74	postive
ITGA1	AL356495.1	0.708713	2.94e-76	postive
CD160	AC022133.2	0.830816	8.57e-127	postive
RORA-AS1	AC022133.2	0.830787	8.89e-127	postive
ARLNC1	AC022133.2	0.767394	1.23e-96	postive
MROH7	AC022133.2	0.785868	2.4e-104	postive
ADAMTSL4-AS2	AC022133.2	0.754242	1.43e-91	postive
SEMA6A-AS1	AC022133.2	0.849987	1.72e-138	postive
PRDX6-AS1	AC022133.2	0.7179	4.2e-79	postive
ZNF788P	AC022133.2	0.752224	8.01e-91	postive
CD160	AC103858.1	0.702543	2.08e-74	postive
CAMK1D	AC104051.2	0.894298	3.02e-173	postive
CD160	AC090970.1	0.719727	1.11e-79	postive
RORA-AS1	AC090970.1	0.812032	1.12e-116	postive
MROH7	AC090970.1	0.707896	5.19e-76	postive
ADAMTSL4-AS2	AC090970.1	0.713891	7.56e-78	postive
LINC02614	LINC02614	1	0	postive
PRDX6-AS1	LINC02614	0.720847	4.85e-80	postive
CD160	AC009102.2	0.747137	5.75e-89	postive
ADRA1A	AC009102.2	0.702668	1.91e-74	postive
PREX2	AC009102.2	0.706683	1.21e-75	postive
ARHGAP20	AC009102.2	0.749982	5.33e-90	postive
CACNA1C	AC009102.2	0.709808	1.36e-76	postive
SYNE1	AC009102.2	0.716942	8.41e-79	postive
MROH7	AC009102.2	0.723064	9.41e-81	postive
CD160	ARLNC1	0.701855	3.31e-74	postive
RORA-AS1	ARLNC1	0.720096	8.44e-80	postive
ARLNC1	ARLNC1	1	0	postive
SEMA6A-AS1	ARLNC1	0.728192	1.99e-82	postive
MROH7	AL031283.2	0.748874	1.35e-89	postive
CD160	AC090948.2	0.895345	3.02e-174	postive
RORA-AS1	AC090948.2	0.947421	1.25e-244	postive
ARLNC1	AC090948.2	0.734241	1.87e-84	postive
MROH7	AC090948.2	0.799963	9.22e-111	postive
ADAMTSL4-AS2	AC090948.2	0.848509	1.56e-137	postive
SEMA6A-AS1	AC090948.2	0.803804	1.34e-112	postive
PRDX6-AS1	AC090948.2	0.700031	1.14e-73	postive
ZNF788P	AC090948.2	0.795507	1.12e-108	postive
CD160	FAM53B-AS1	0.877527	1.63e-158	postive
RORA-AS1	FAM53B-AS1	0.914249	2.13e-194	postive
ARLNC1	FAM53B-AS1	0.782705	5.68e-103	postive
MROH7	FAM53B-AS1	0.830445	1.4e-126	postive
ADAMTSL4-AS2	FAM53B-AS1	0.825051	1.46e-123	postive
SEMA6A-AS1	FAM53B-AS1	0.856775	4.94e-143	postive
PRDX6-AS1	FAM53B-AS1	0.734586	1.43e-84	postive
ZNF788P	FAM53B-AS1	0.790972	1.3e-106	postive
CD160	AC009163.4	0.847449	7.5e-137	postive
HERC3	AC009163.4	0.740153	1.72e-86	postive
RORA-AS1	AC009163.4	0.847007	1.44e-136	postive
RMST	AC009163.4	0.753447	2.82e-91	postive
SEMA6A-AS1	AC009163.4	0.810736	5.05e-116	postive
ZNF788P	AC009163.4	0.724416	3.43e-81	postive
MANEA-DT	MANEA-DT	1	0	postive
RORA-AS1	AC104118.1	0.836957	2.25e-130	postive
ADAMTSL4-AS2	AC104118.1	0.78384	1.84e-103	postive
RMST	AC012588.1	0.820643	3.62e-121	postive
AQP4-AS1	AC012588.1	0.960818	3.36e-275	postive
CD160	AL355102.1	0.8493	4.8e-138	postive
RORA-AS1	AL355102.1	0.883401	2.05e-163	postive
ARLNC1	AL355102.1	0.781402	2.06e-102	postive
MROH7	AL355102.1	0.832075	1.62e-127	postive
ADAMTSL4-AS2	AL355102.1	0.824023	5.36e-123	postive
SEMA6A-AS1	AL355102.1	0.842454	1.04e-133	postive
PRDX6-AS1	AL355102.1	0.717122	7.38e-79	postive
ZNF788P	AL355102.1	0.775585	5.79e-100	postive
CD160	SEMA6A-AS1	0.824589	2.63e-123	postive
C6orf163	SEMA6A-AS1	0.709548	1.64e-76	postive
RORA-AS1	SEMA6A-AS1	0.752439	6.67e-91	postive
ARLNC1	SEMA6A-AS1	0.728192	1.99e-82	postive
MROH7	SEMA6A-AS1	0.744159	6.69e-88	postive
ADAMTSL4-AS2	SEMA6A-AS1	0.71608	1.57e-78	postive
SEMA6A-AS1	SEMA6A-AS1	1	0	postive
PRDX6-AS1	SEMA6A-AS1	0.784205	1.28e-103	postive
ZNF788P	SEMA6A-AS1	0.755986	3.17e-92	postive
CD160	ASTN2-AS1	0.852955	1.89e-140	postive
RORA-AS1	ASTN2-AS1	0.885696	2.11e-165	postive
ARLNC1	ASTN2-AS1	0.772003	1.72e-98	postive
MROH7	ASTN2-AS1	0.793711	7.46e-108	postive
ADAMTSL4-AS2	ASTN2-AS1	0.777419	9.96e-101	postive
SEMA6A-AS1	ASTN2-AS1	0.858093	6.1e-144	postive
PRDX6-AS1	ASTN2-AS1	0.73598	4.77e-85	postive
ZNF788P	ASTN2-AS1	0.780625	4.41e-102	postive
CD160	AC012464.2	0.798713	3.58e-110	postive
[truncated: 2,493 more rows]
